# Supplementary material
Source: PubMed Central journal article supplement (PMC6022888)
Supplement: Supplemental_Material.pdf [file Supplemental_Material.pdf]

## **Appendix A - variation and time trends for prescribing of individual “low priority” medicines**

---

*From - OpenPrescribing: Identifying the general practices prescribing “low priority” treatments*

## Co-proxamol

Variation in spending per thousand patients across CCGs in June 2017:

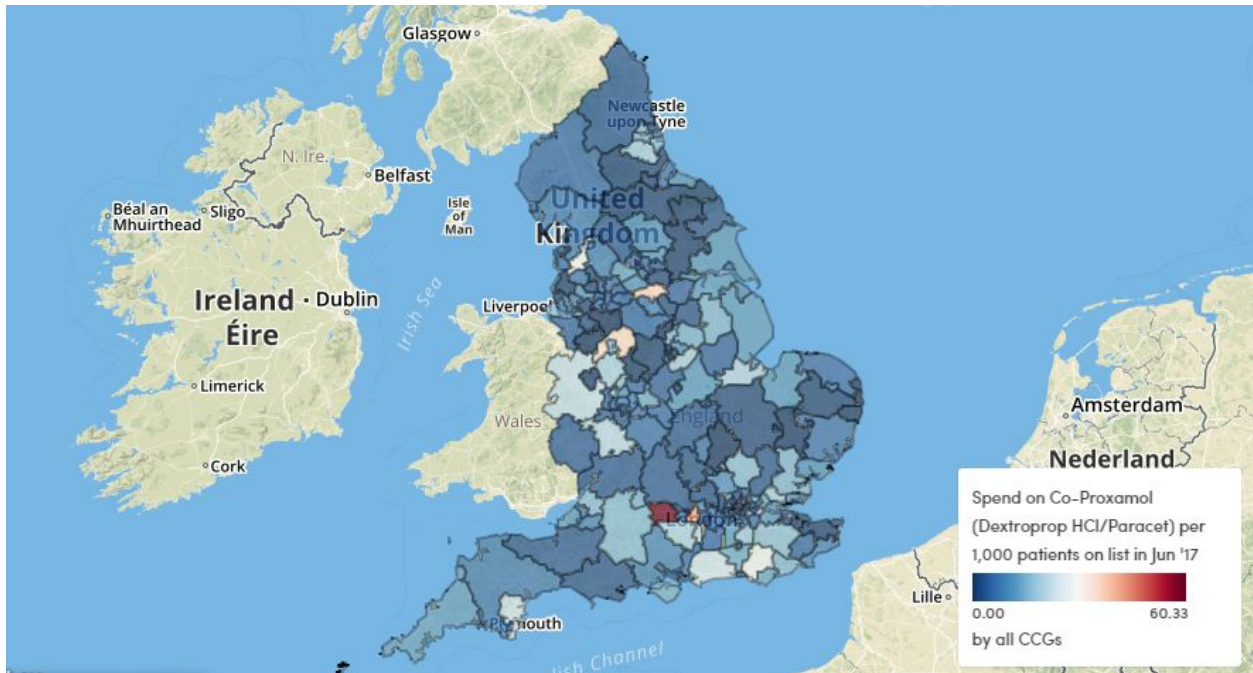

[Interactive map here](#)

Items per practice - distribution across practices

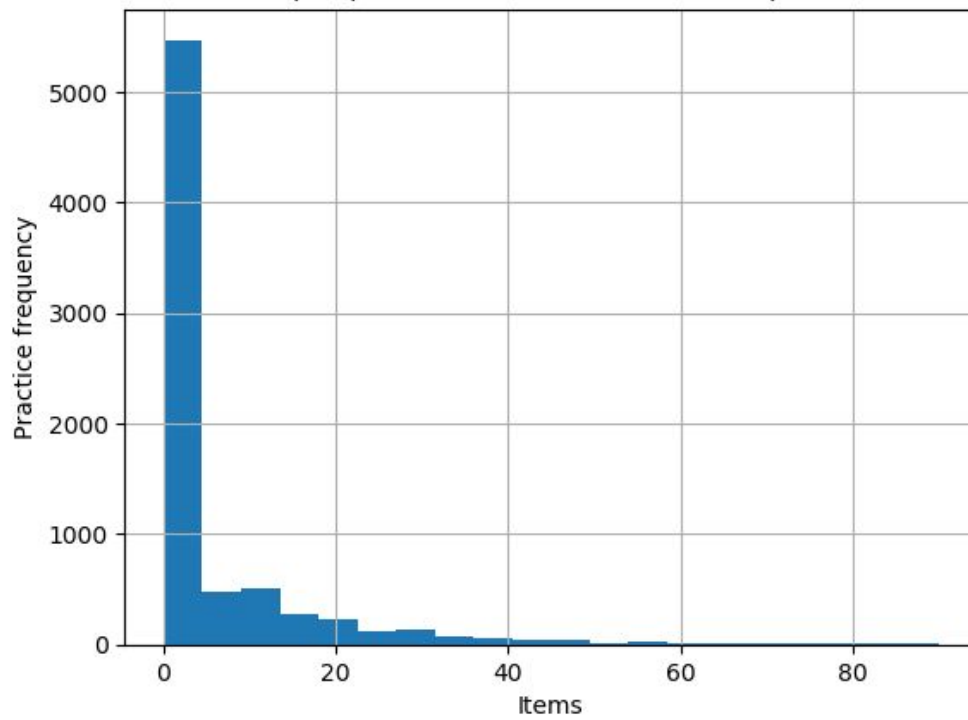

Number of practices prescribing zero items: 4762

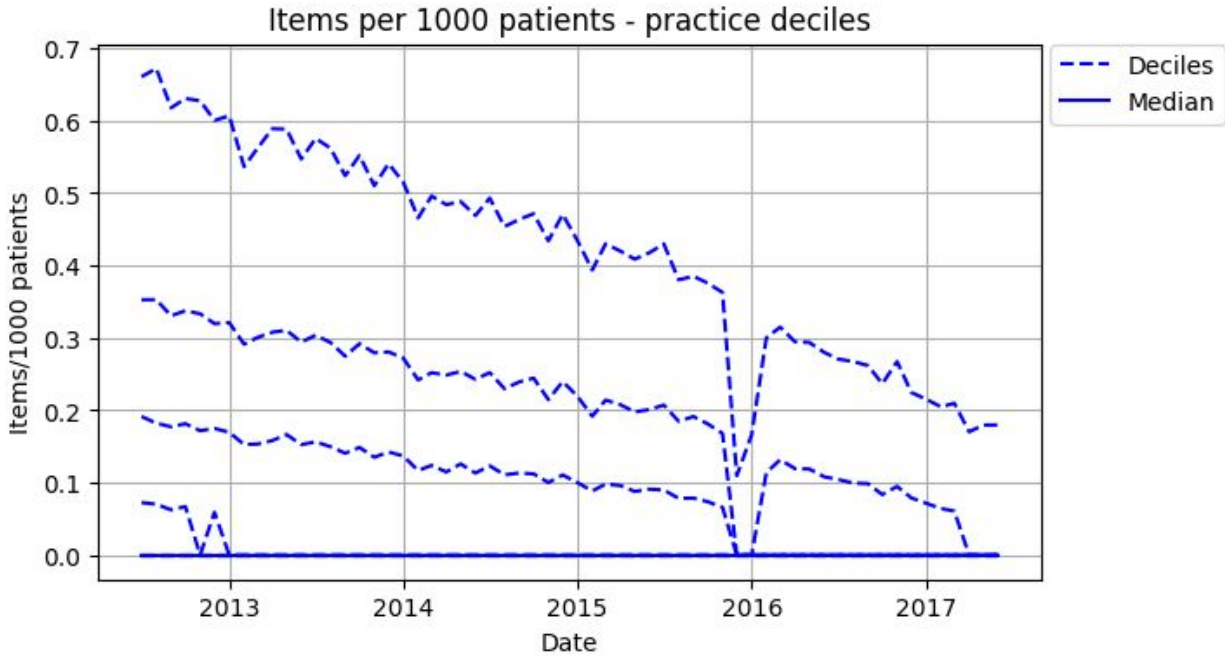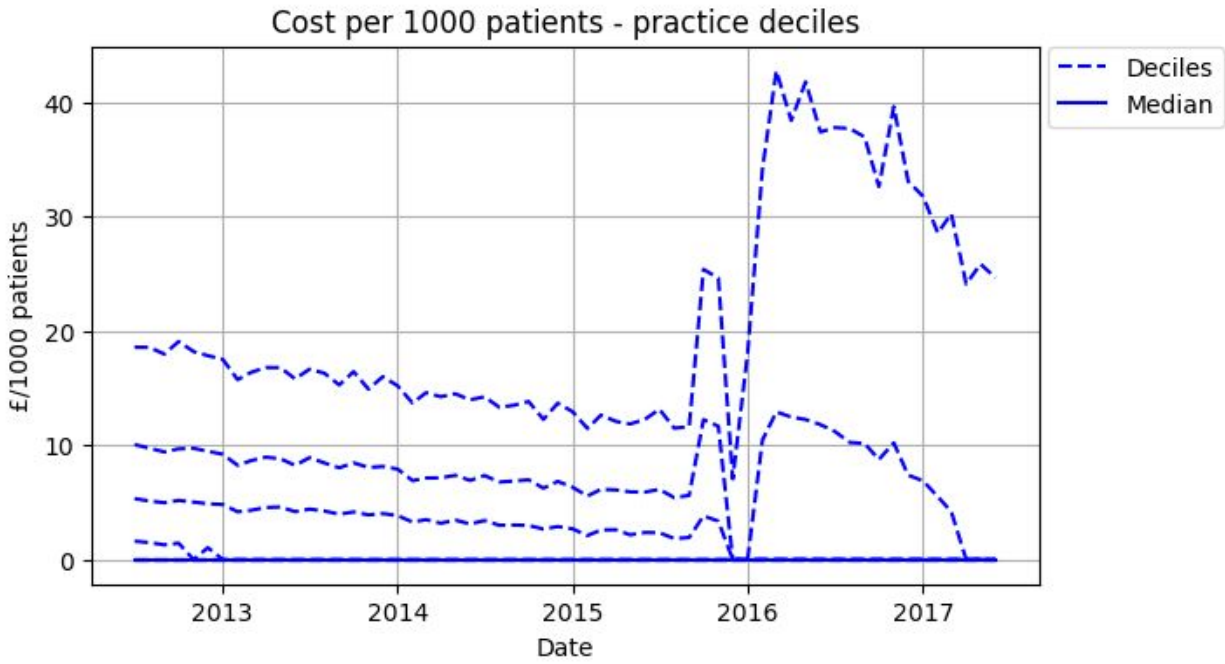

## Dosulepin

Variation in spending per thousand patients across CCGs in June 2017:

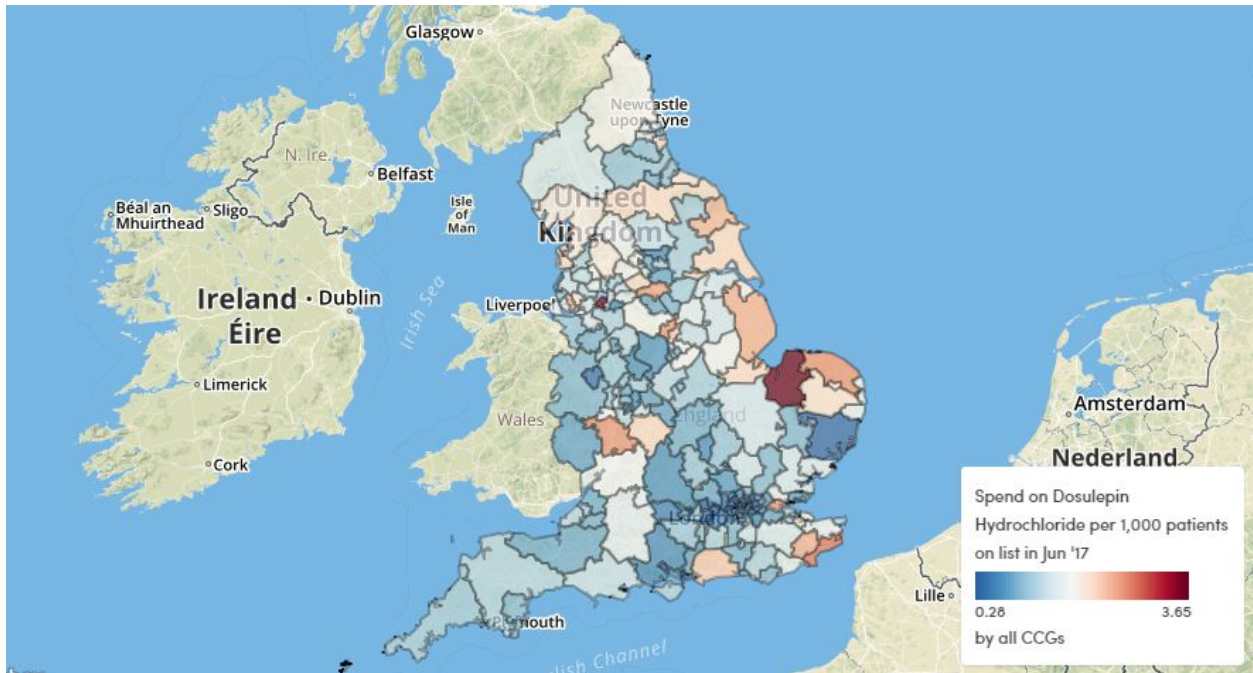

[Interactive map here](#)

### Items per practice - distribution across practices

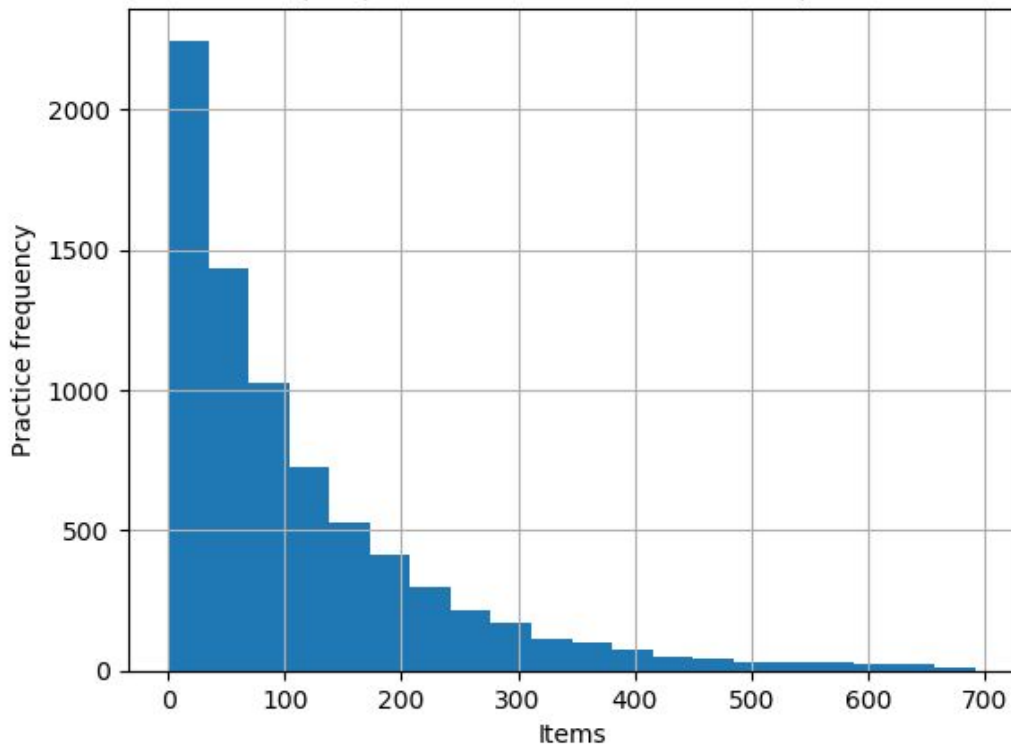

Number of practices prescribing zero items: 422

Items per 1000 patients - practice deciles

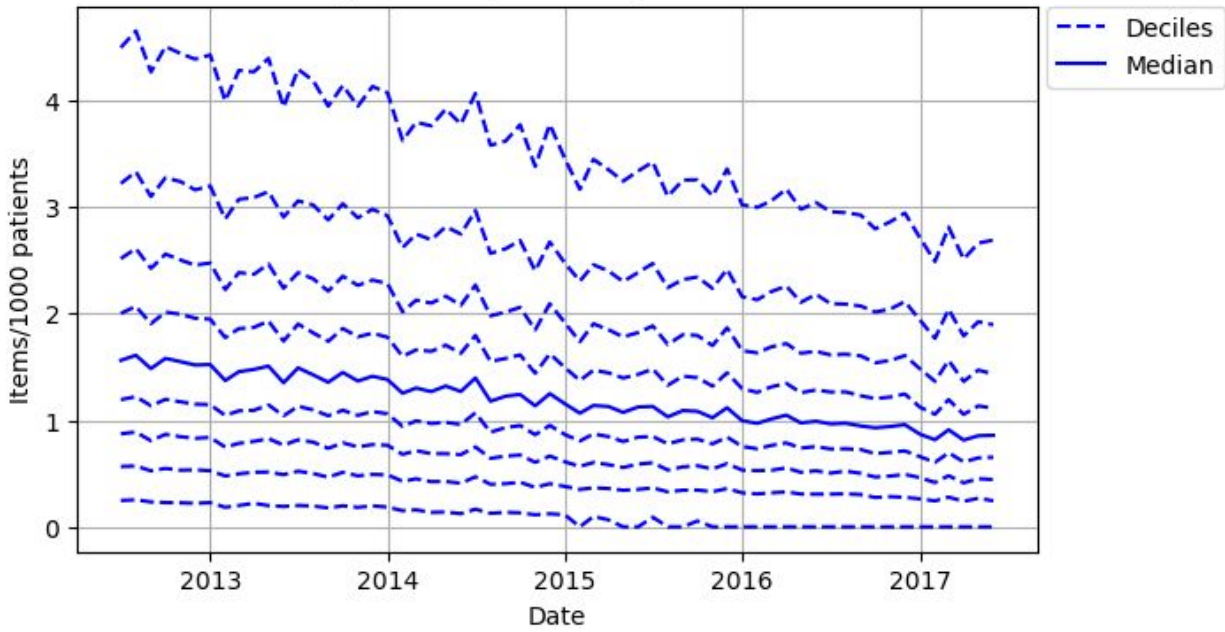

Cost per 1000 patients - practice deciles

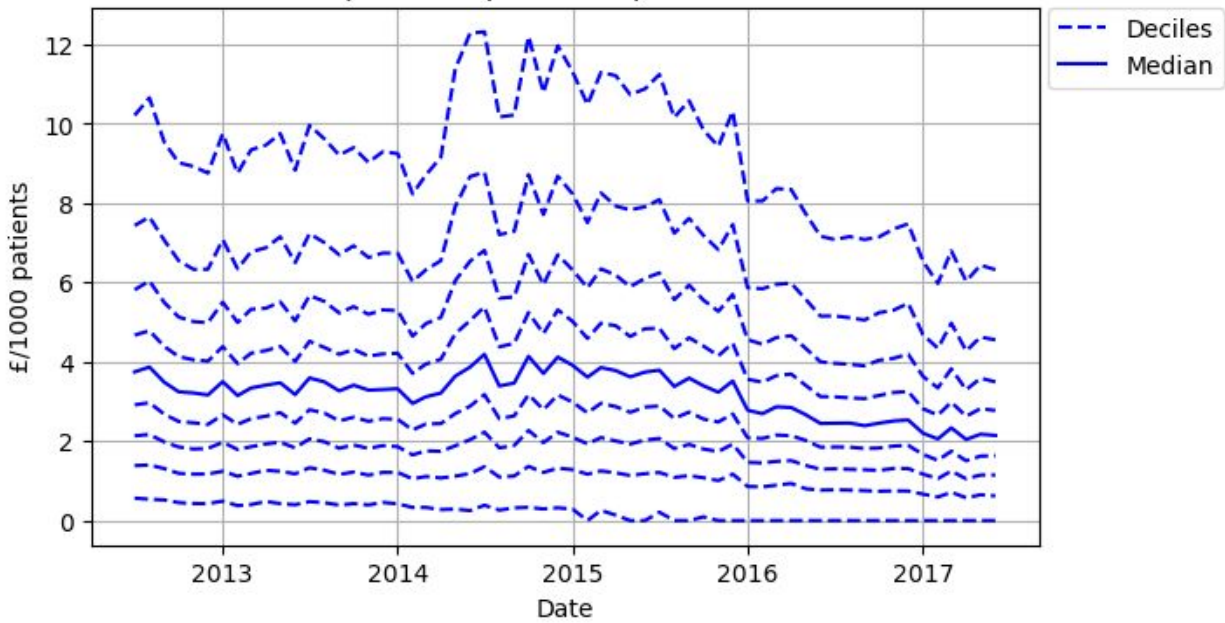



## Doxazosin modified release

Variation in spending per thousand patients across CCGs in June 2017:

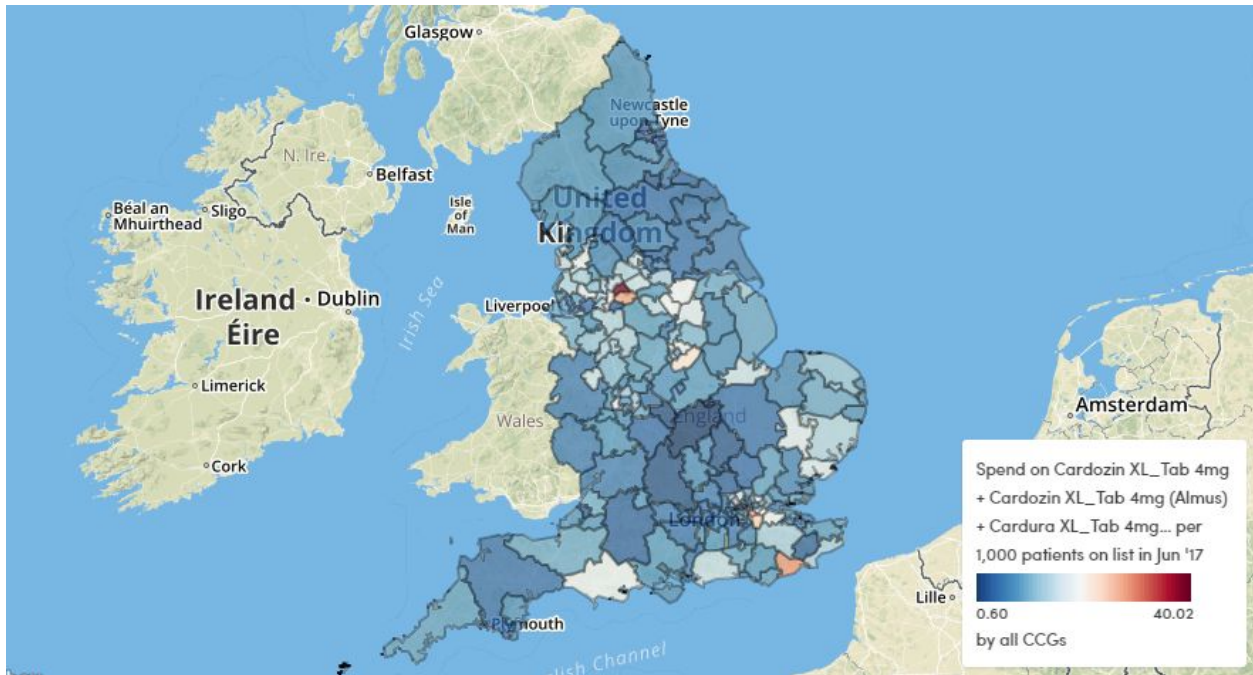

[Interactive map here](#)

Items per practice - distribution across practices

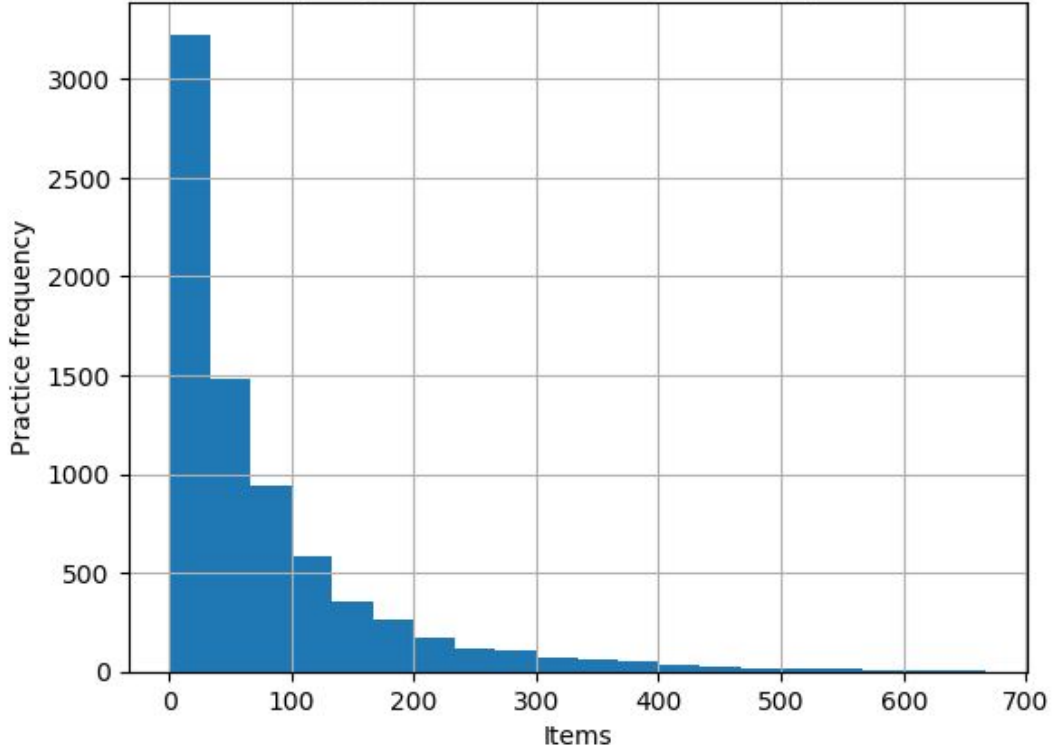

Number of practices prescribing zero items: 556

Items per 1000 patients - practice deciles

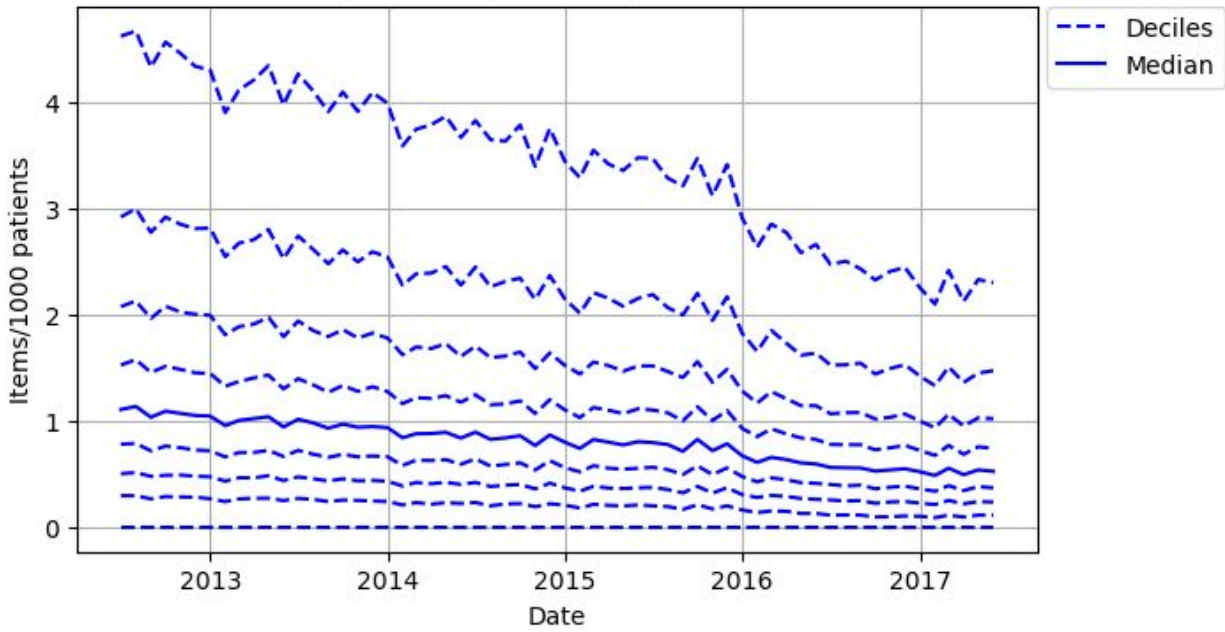

Cost per 1000 patients - practice deciles

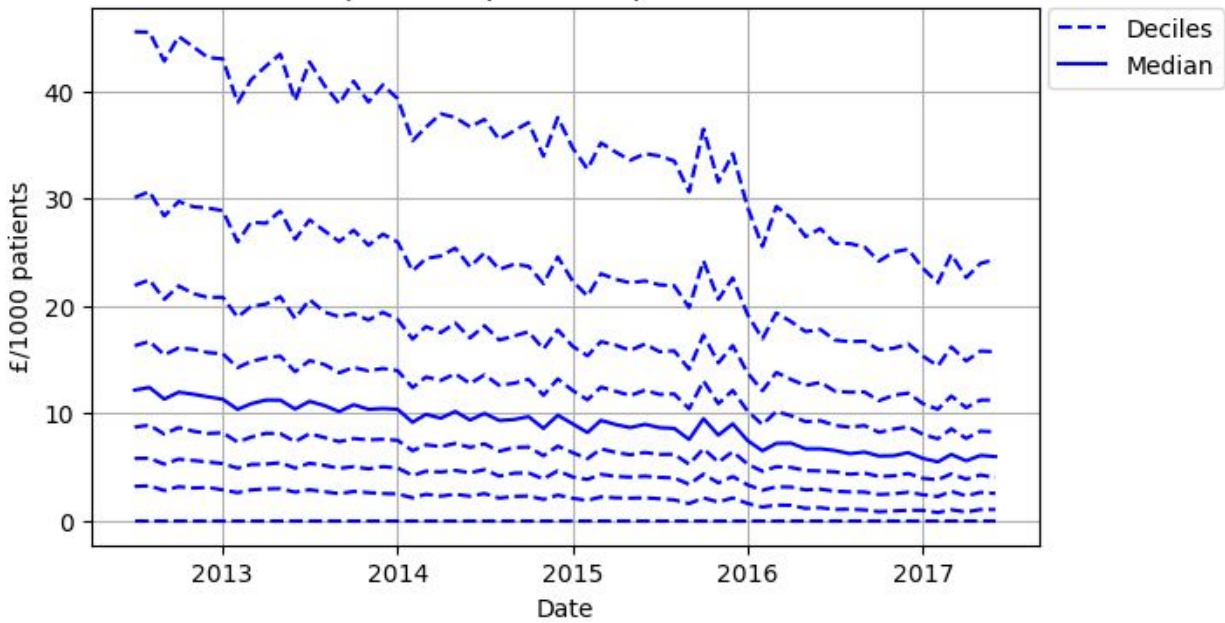

## Fentanyl immediate release

Variation in spending per thousand patients across CCGs in June 2017:

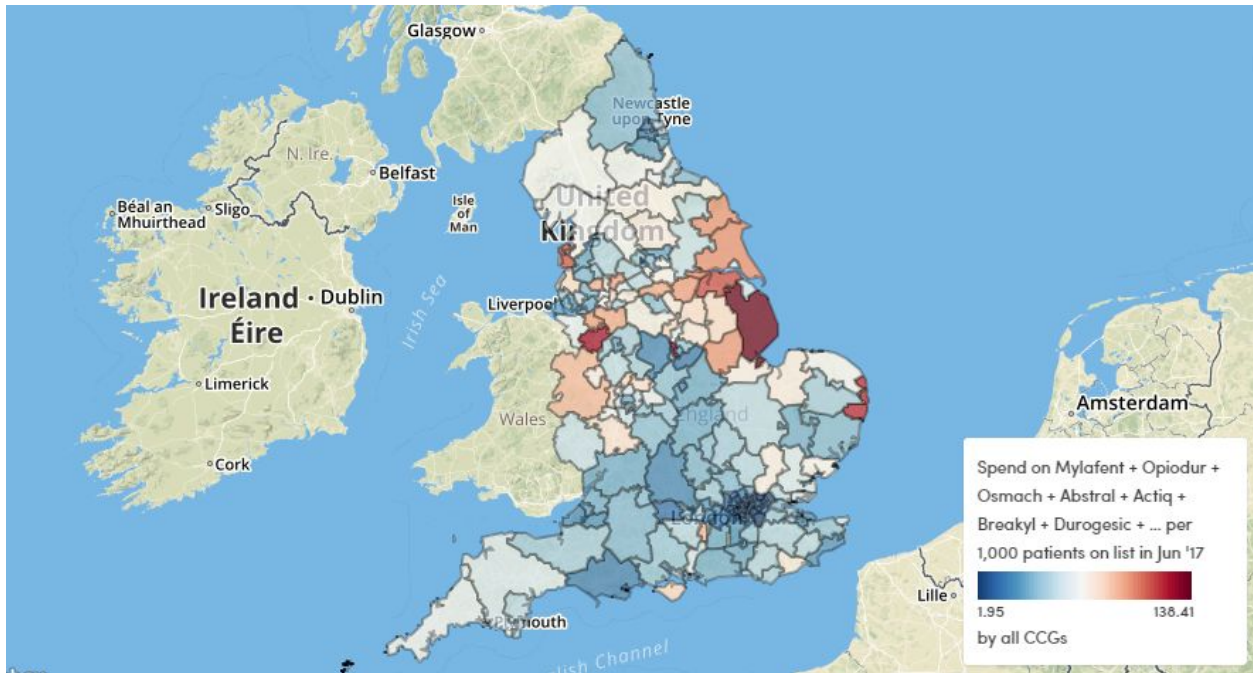

[Interactive map here](#)

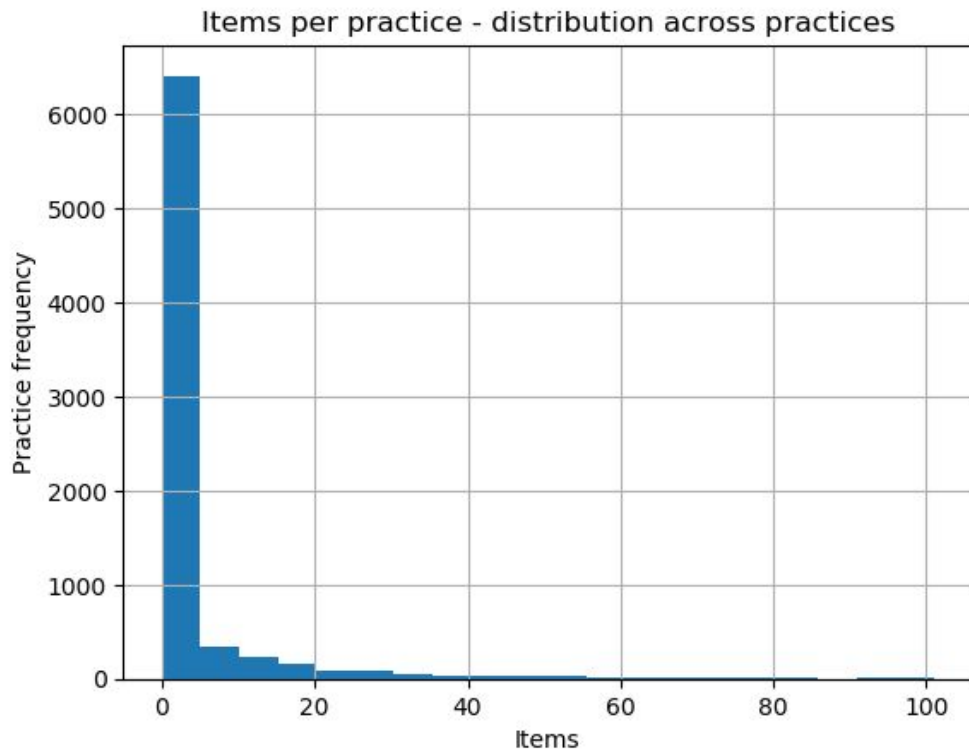

Number of practices prescribing zero items: 5296



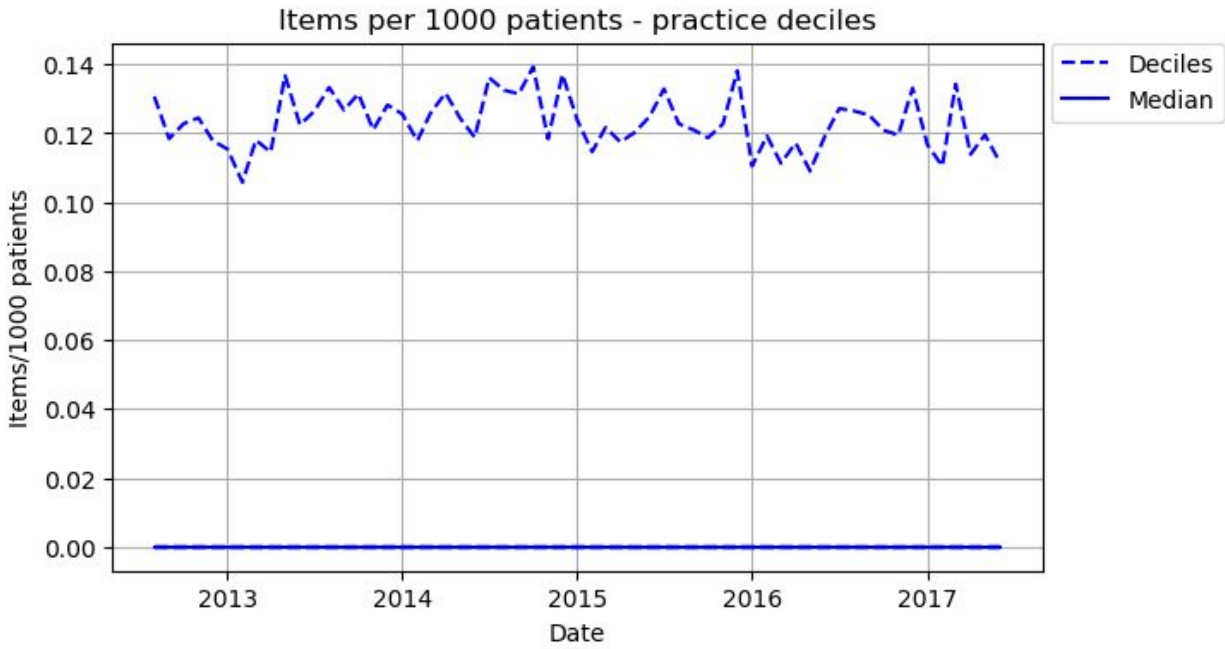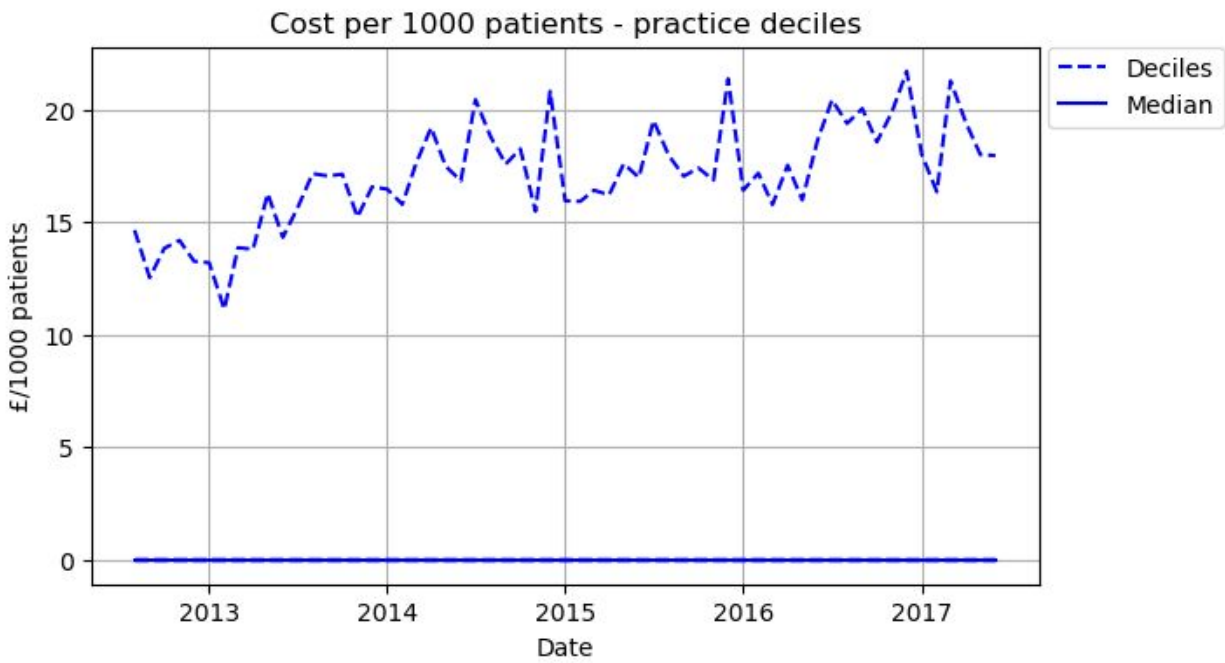

## Glucosamine and chondroitin

Variation in spending per thousand patients across CCGs in June 2017:

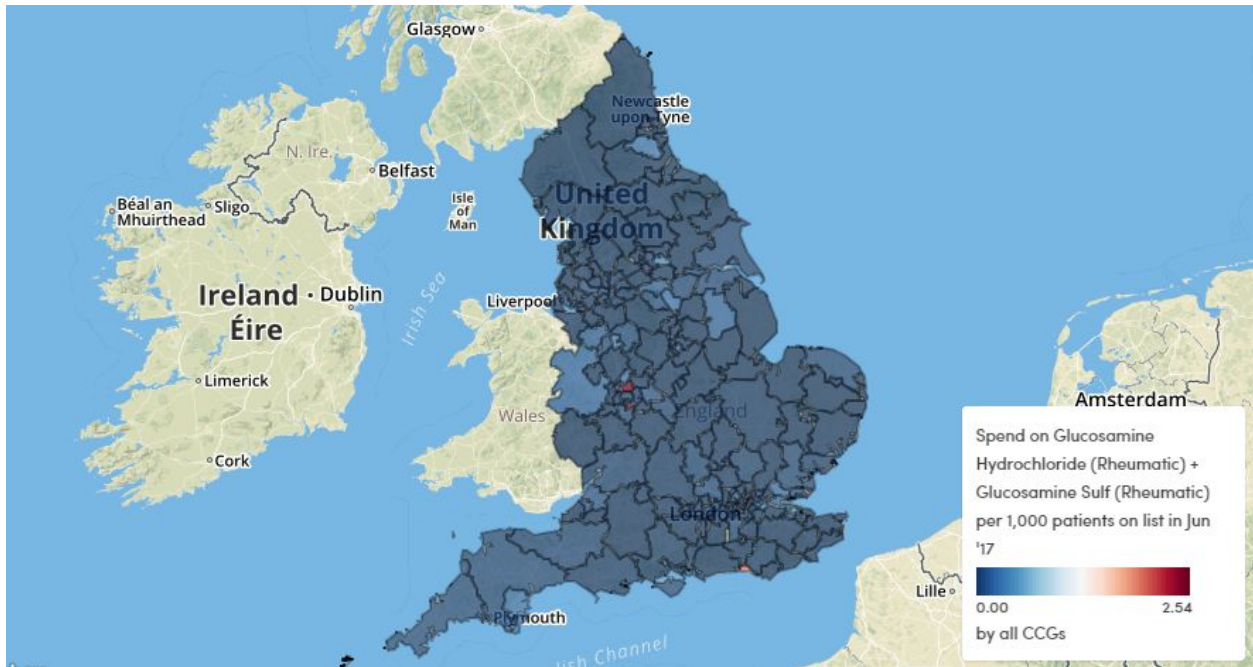

[Interactive map here](#) – this map does not include all relevant products due to web site limitations (though the below charts do)

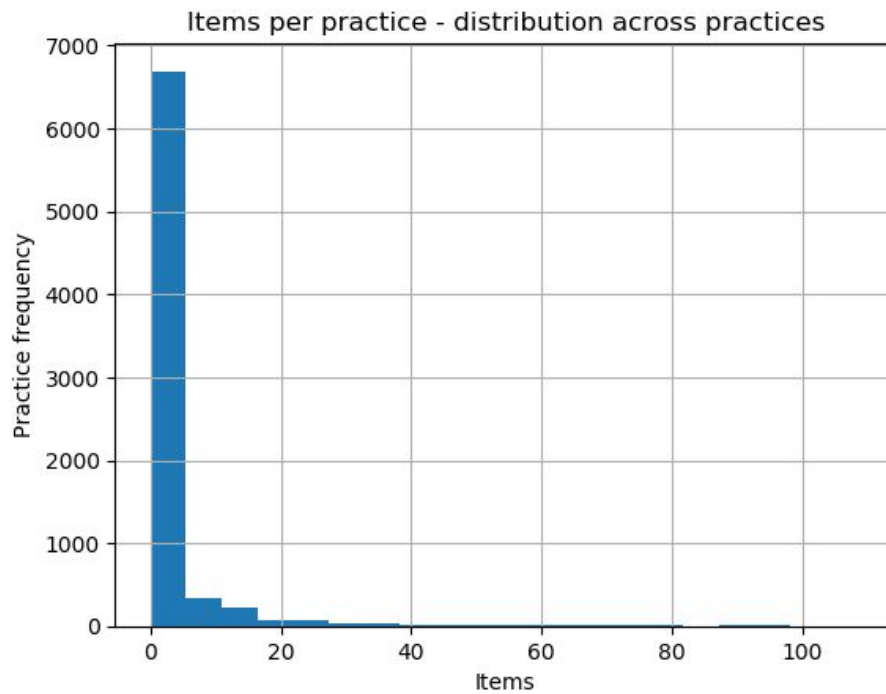

Number of practices prescribing zero items: 5845

Items per 1000 patients - practice deciles

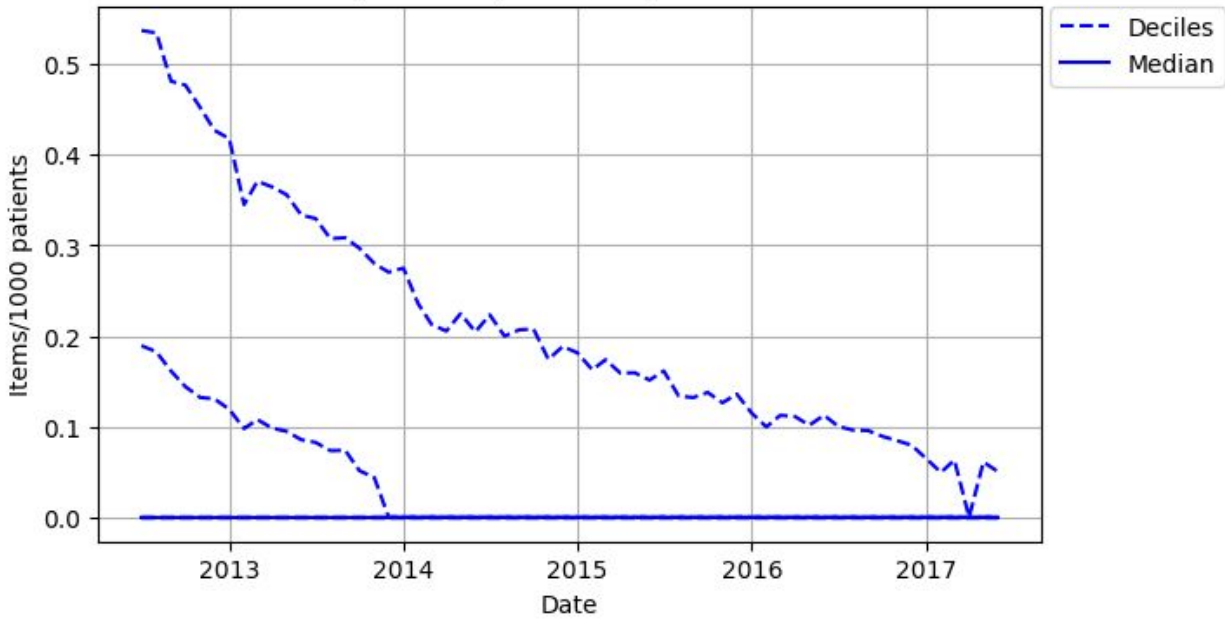

Cost per 1000 patients - practice deciles

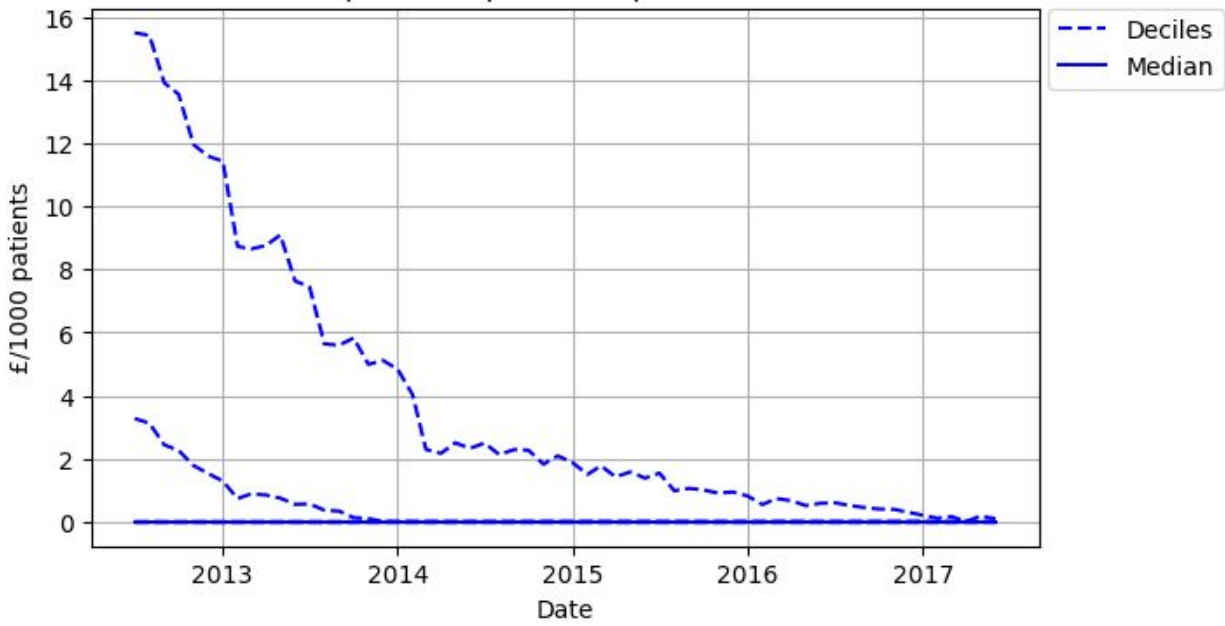

## Gluten free products

Variation in spending per thousand patients across CCGs in June 2017:

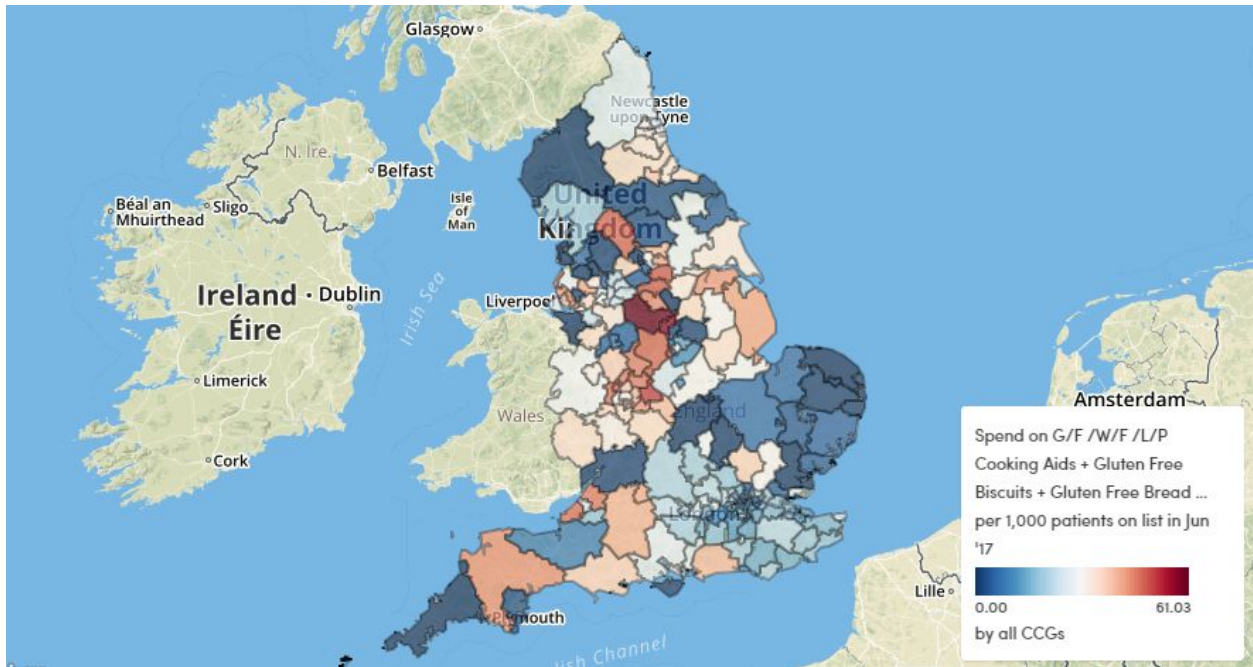

[Interactive map here](#)

Items per practice - distribution across practices

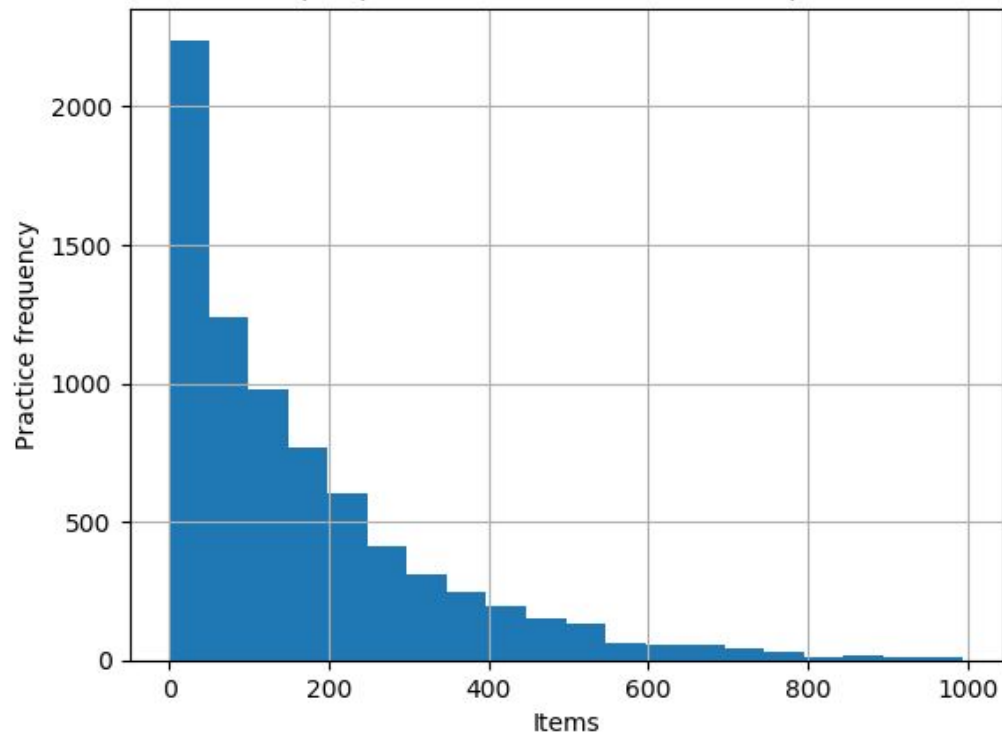

Number of practices prescribing zero items: 605

Items per 1000 patients - practice deciles

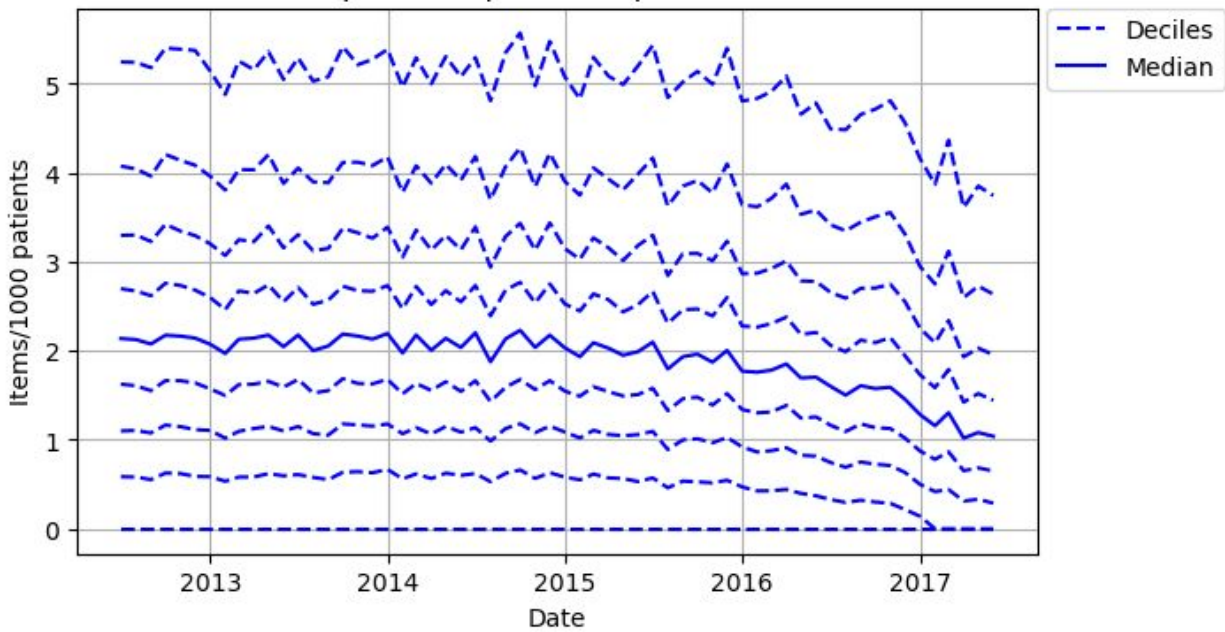

Cost per 1000 patients - practice deciles

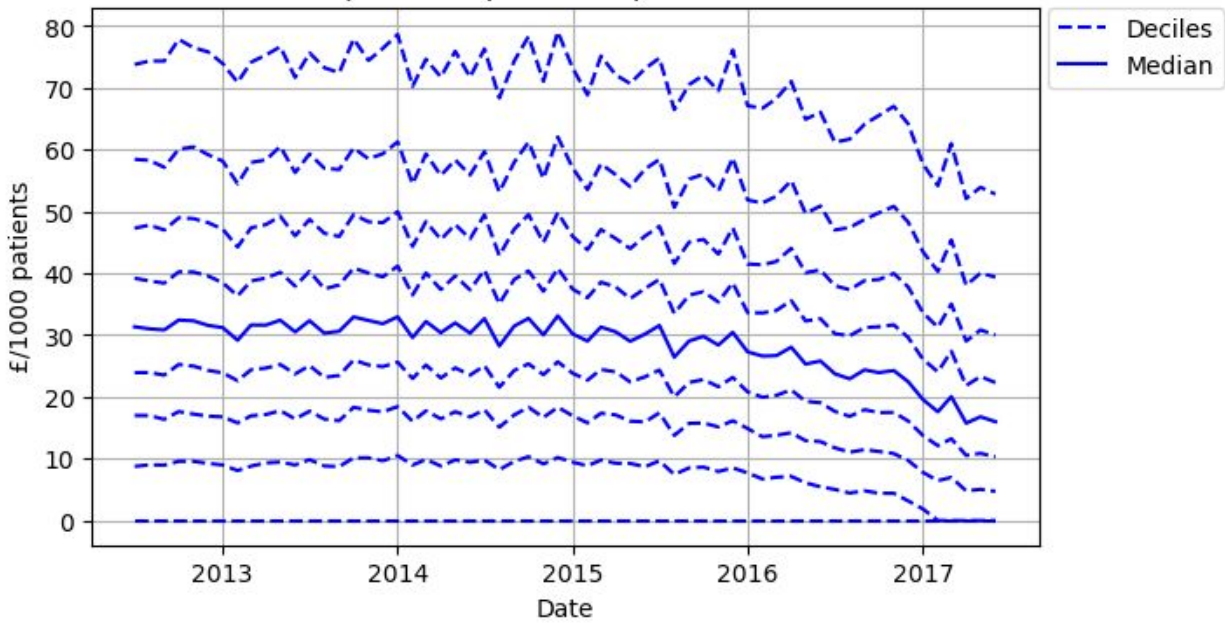



## Homeopathy

Variation in spending per thousand patients across CCGs in June 2017:

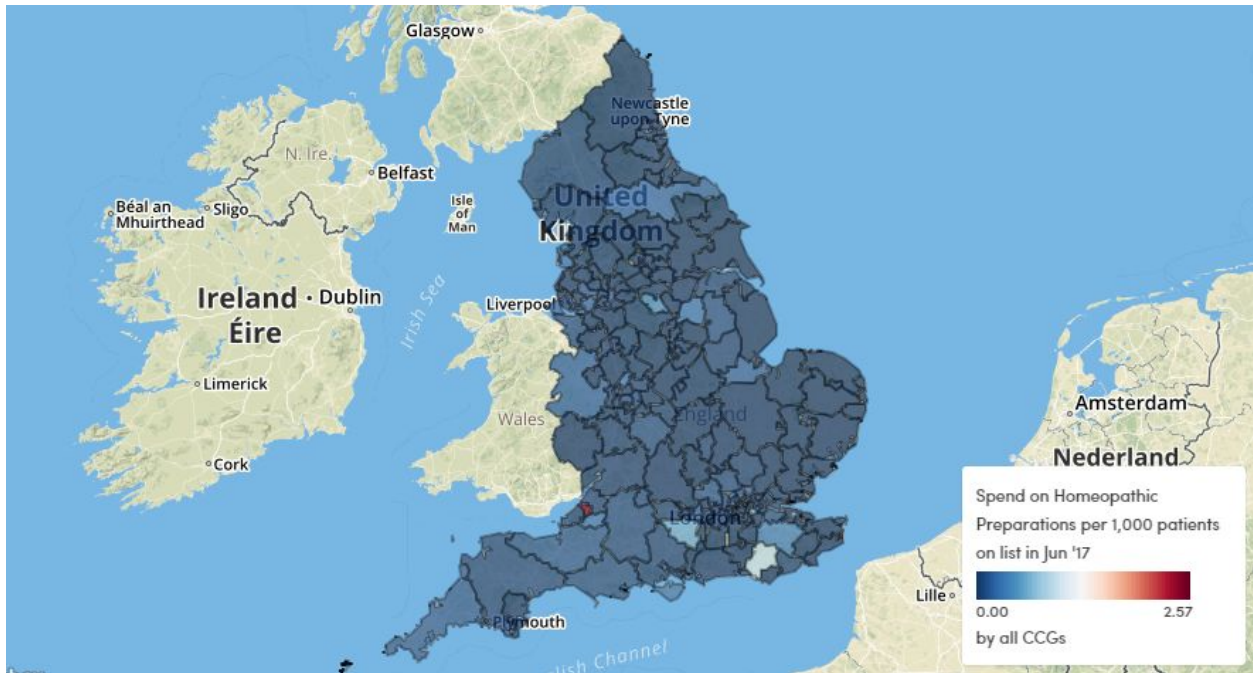

[Interactive map here](#)

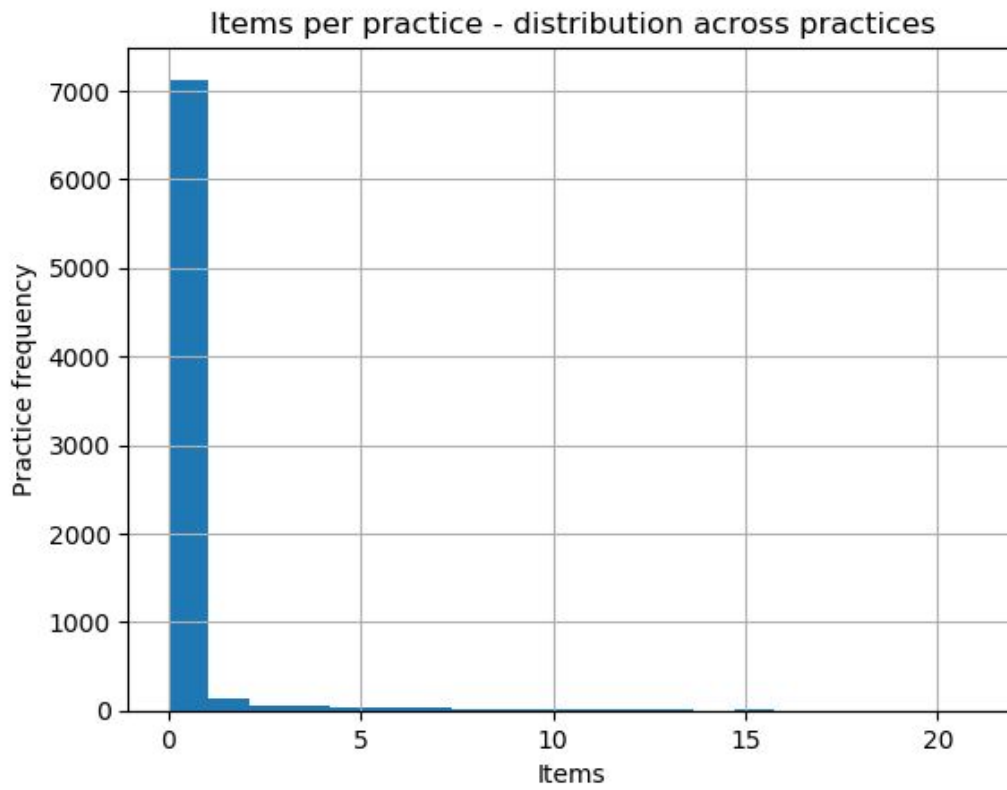

Number of practices prescribing zero items: 6639

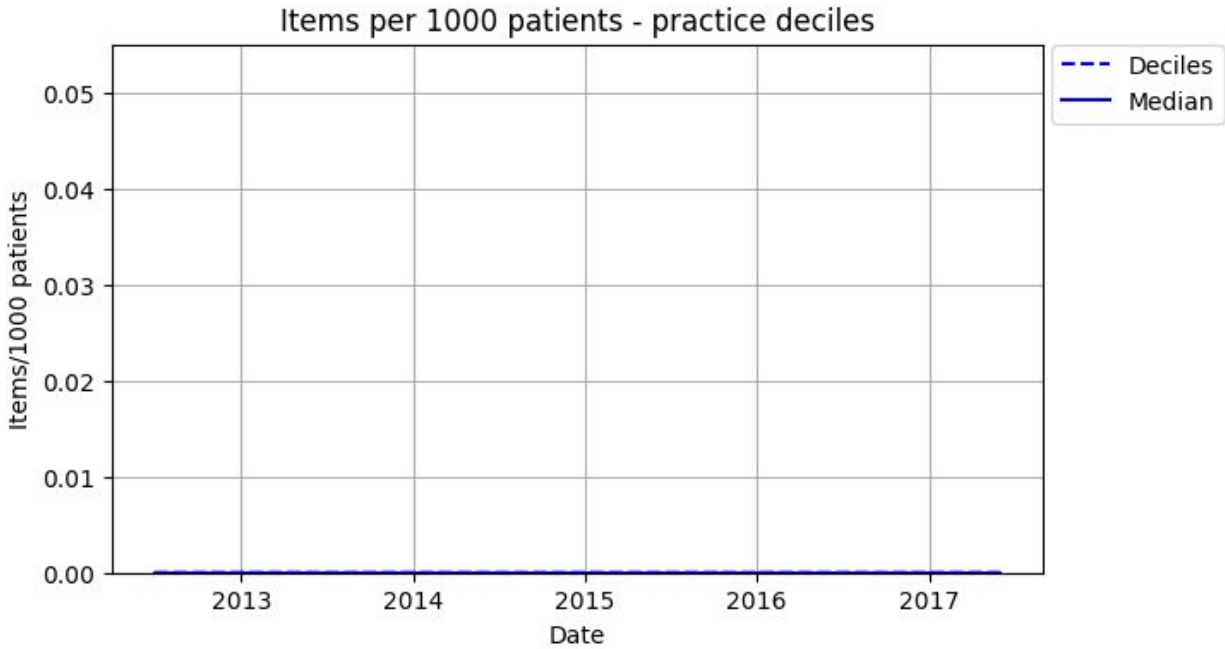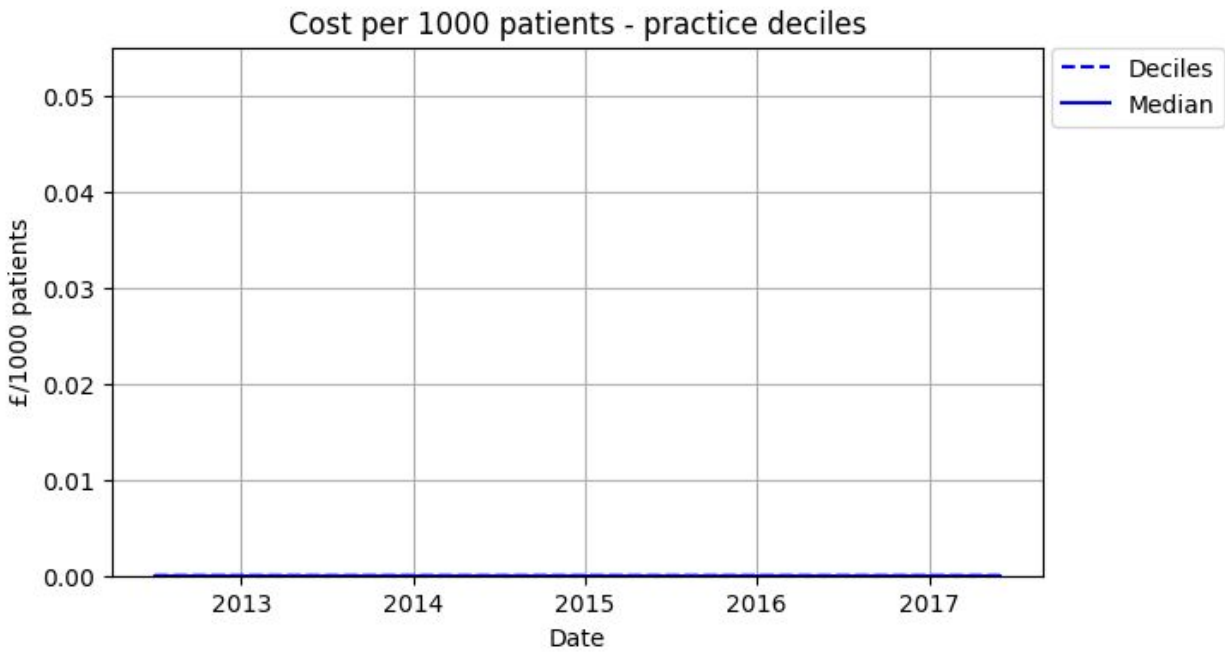

\*the deciles here remain at zero, as less than 10% of practices prescribe homeopathic preparations in any given month.

## Lidocaine plasters

Variation in spending per thousand patients across CCGs in June 2017:

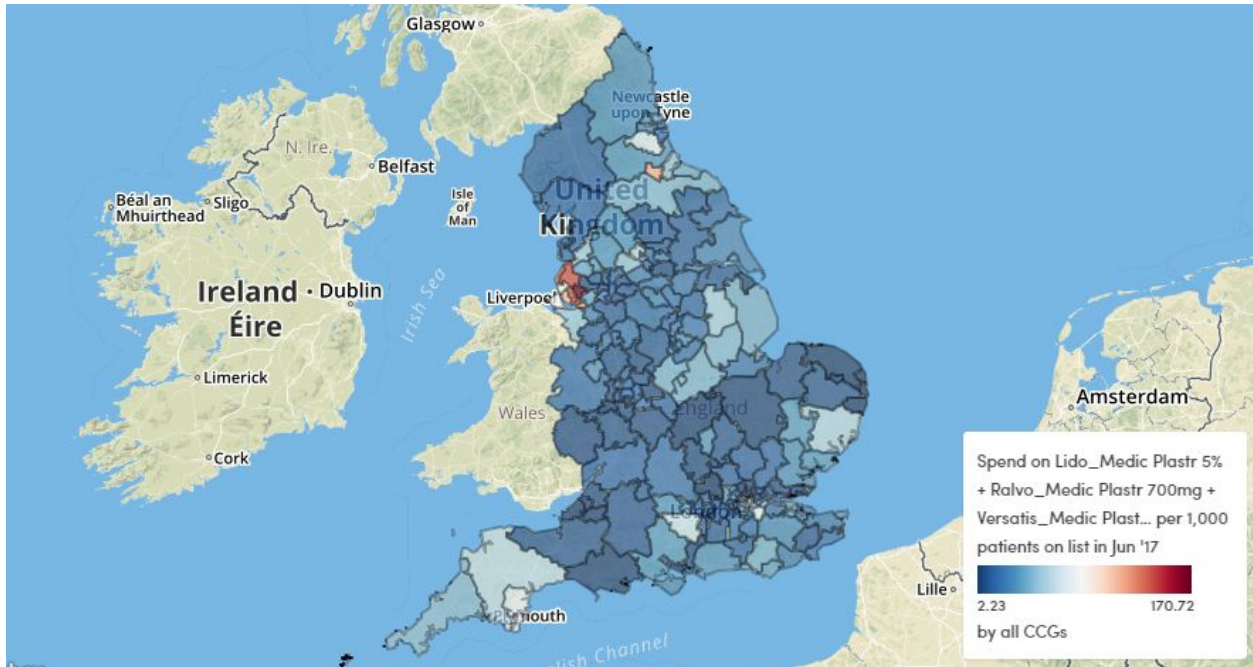

[Interactive map here](#)

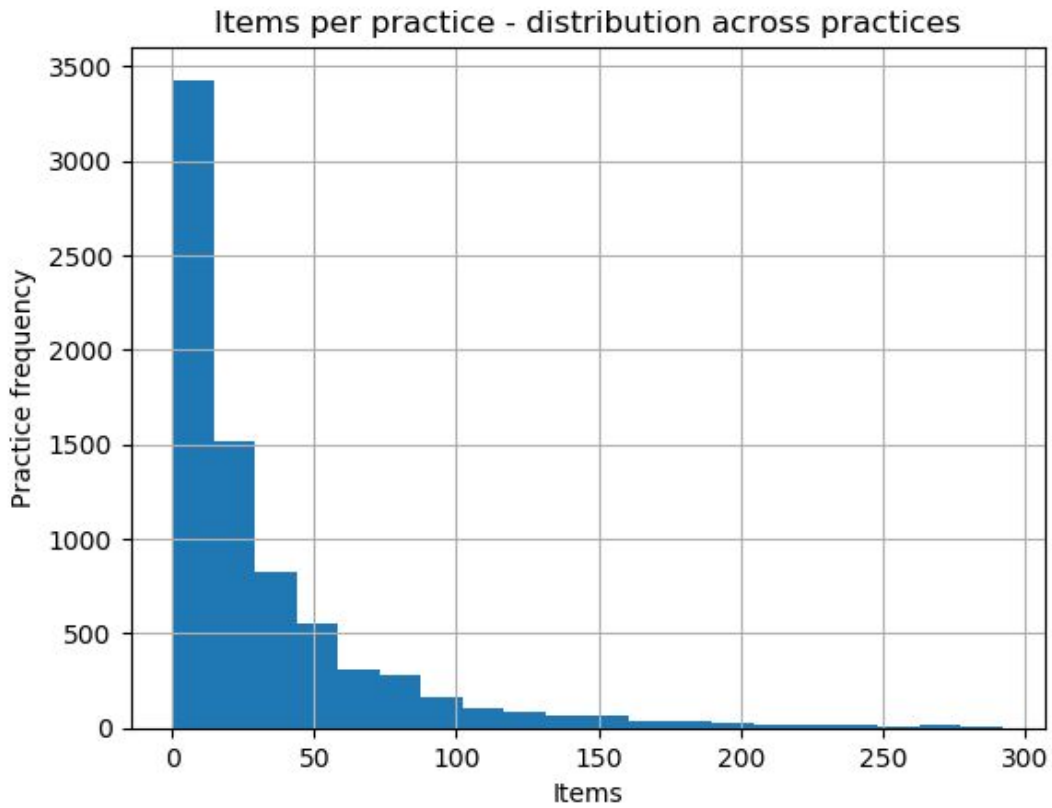

Number of practices prescribing zero items: 810

Items per 1000 patients - practice deciles

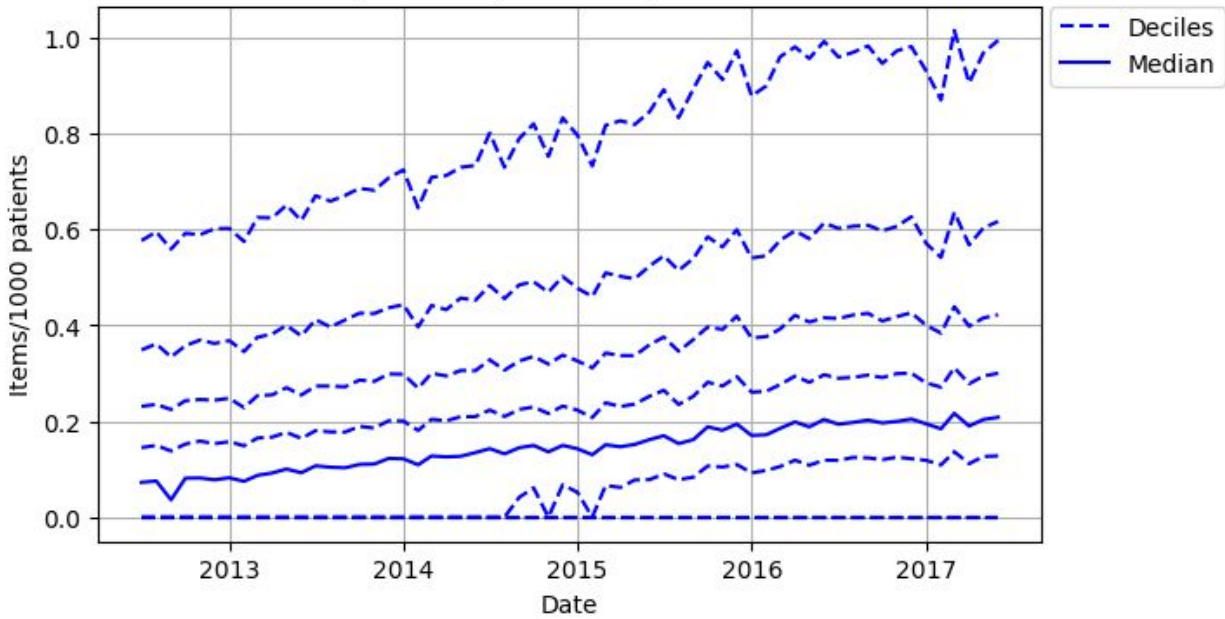

Cost per 1000 patients - practice deciles

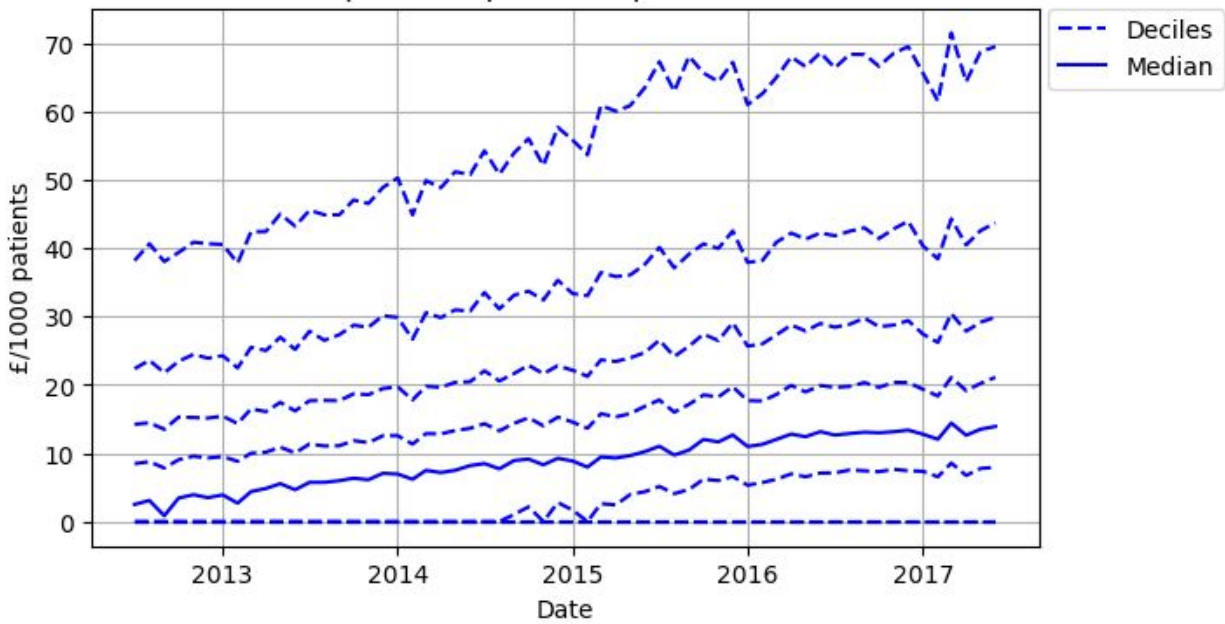

# Liothyronine

Variation in spending per thousand patients across CCGs in June 2017:

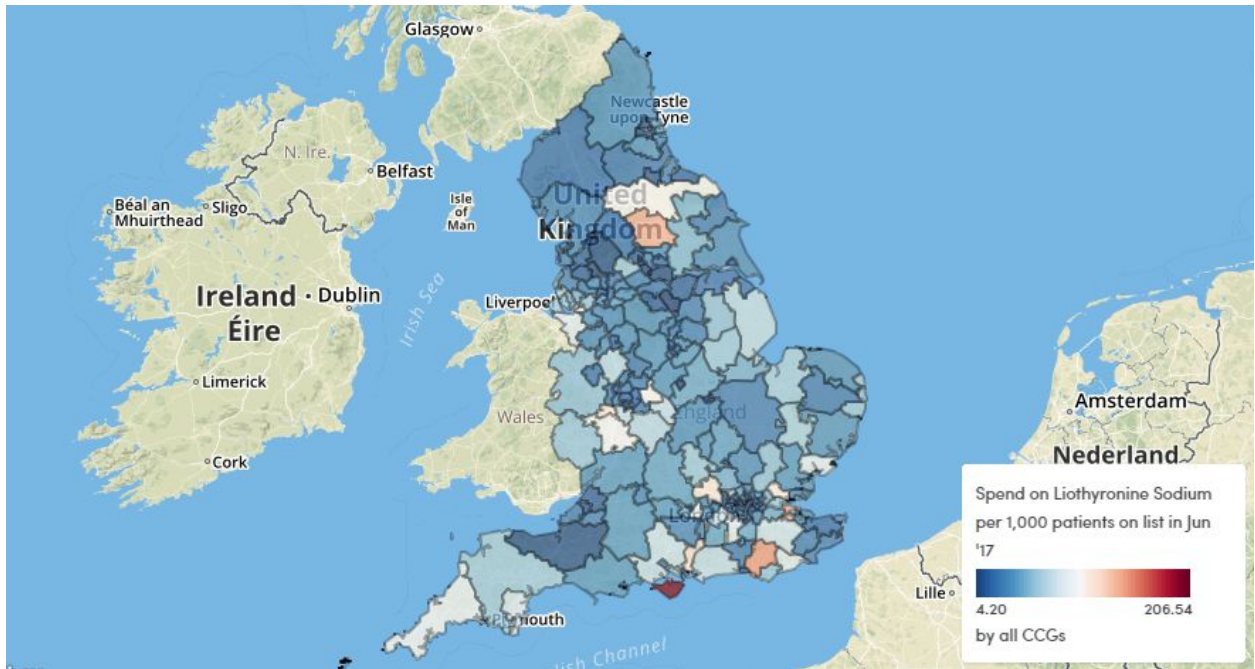

[Interactive map here](#)

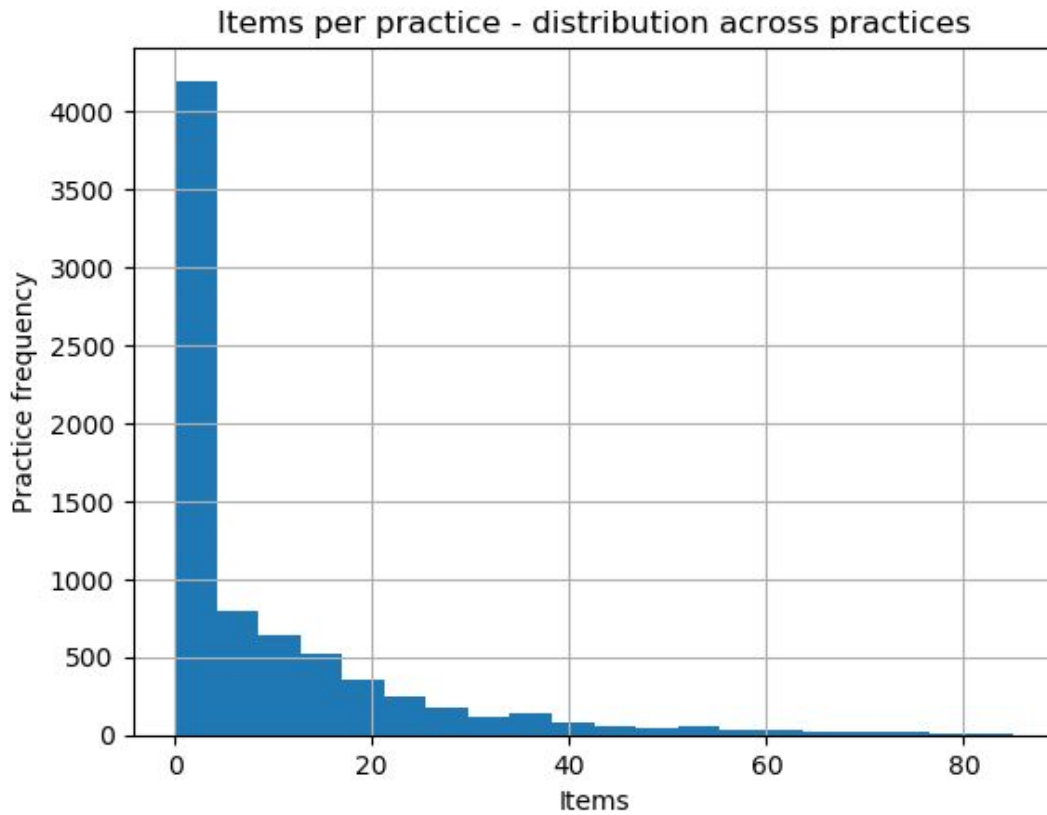

Number of practices prescribing zero items: 3426



Items per 1000 patients - practice deciles

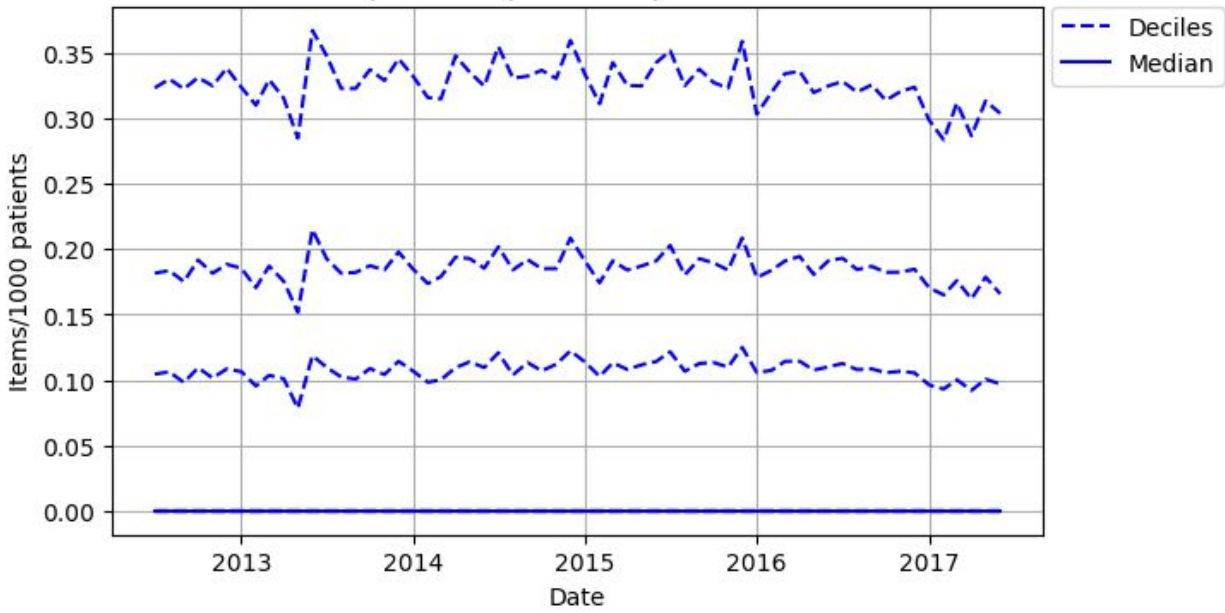

Cost per 1000 patients - practice deciles

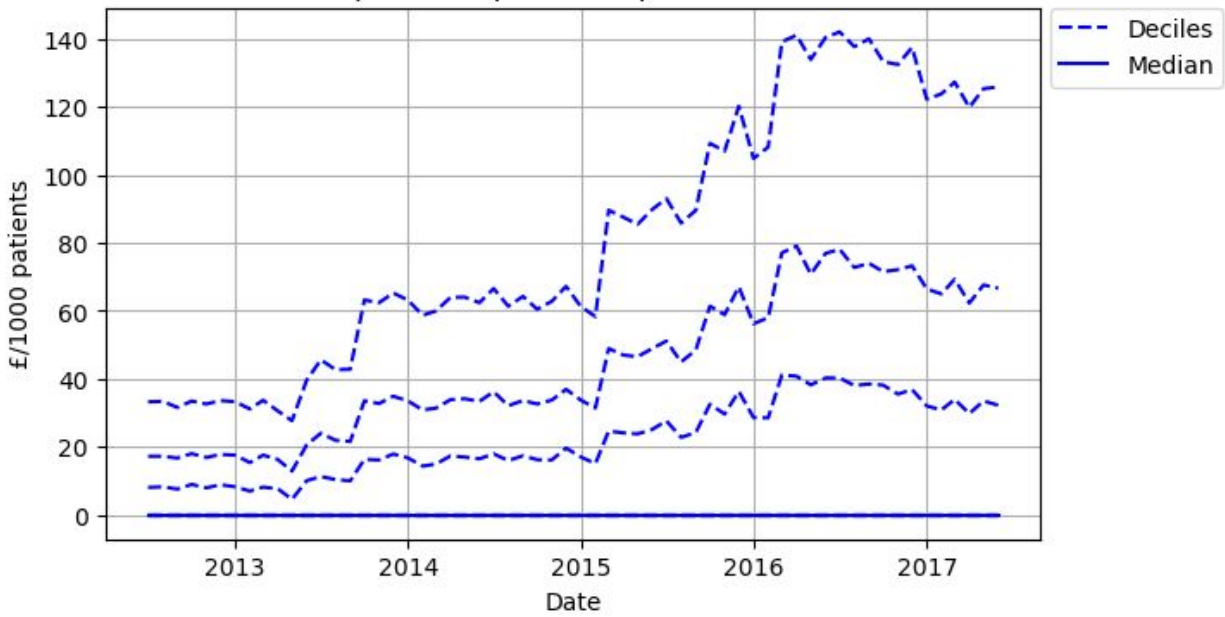

## Lutein and antioxidants

Variation in spending per thousand patients across CCGs in June 2017:

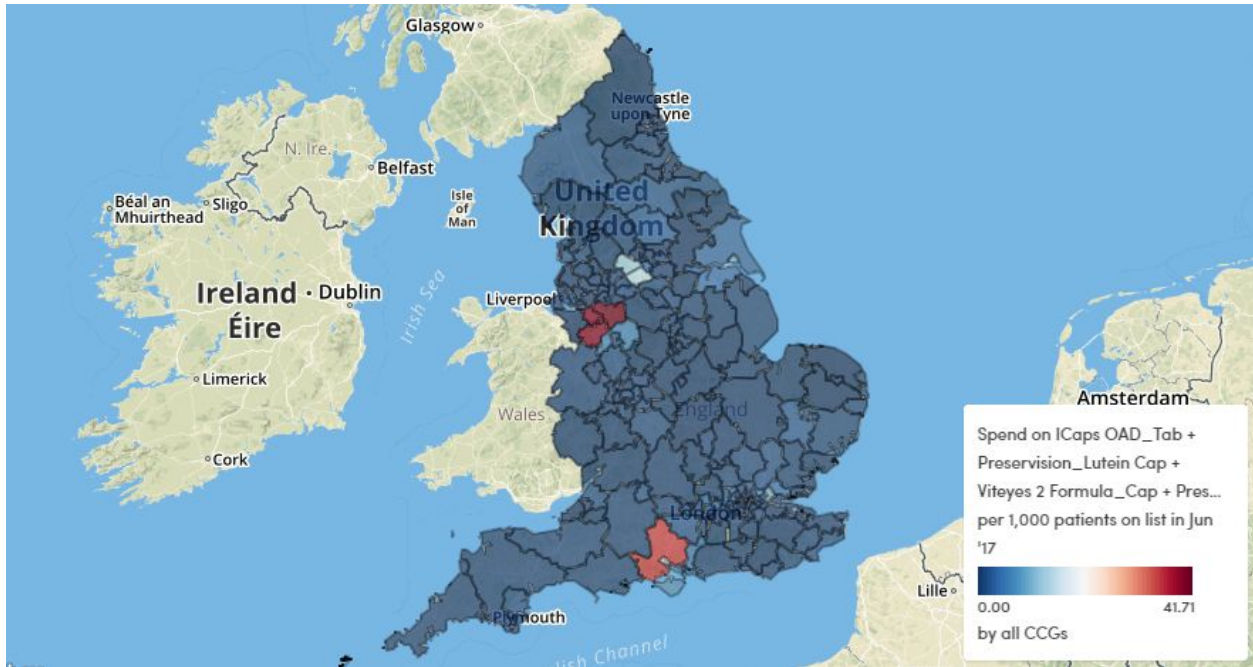

[Interactive map here](#)

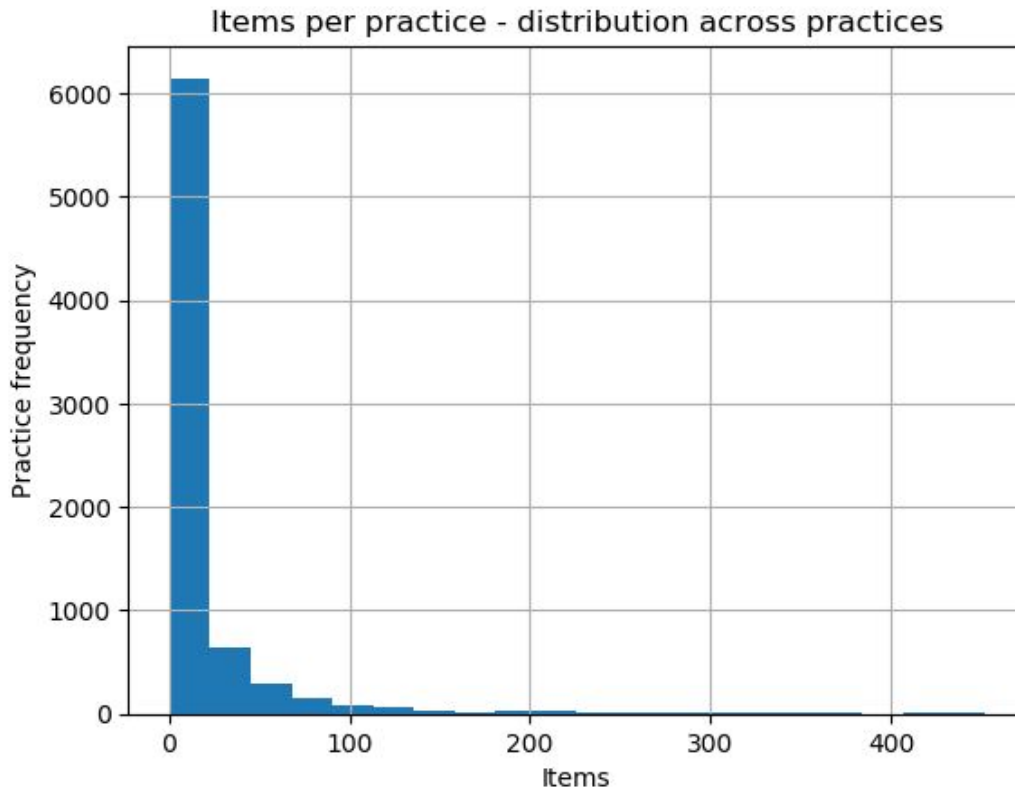

Number of practices prescribing zero items: 3382

Items per 1000 patients - practice deciles

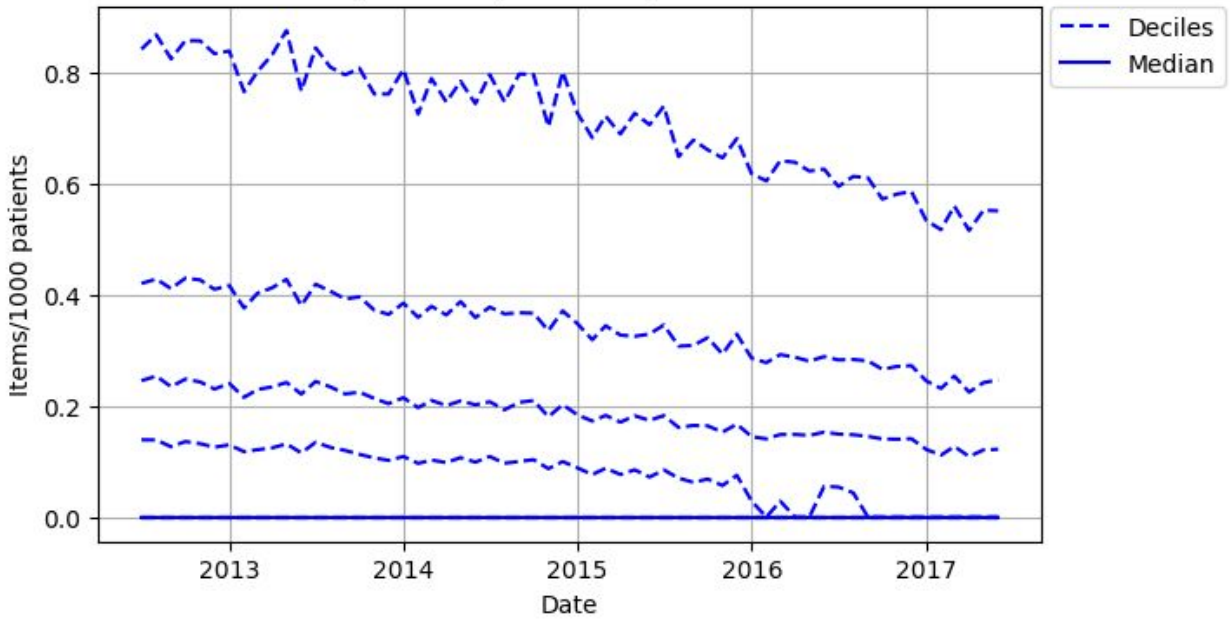

Cost per 1000 patients - practice deciles

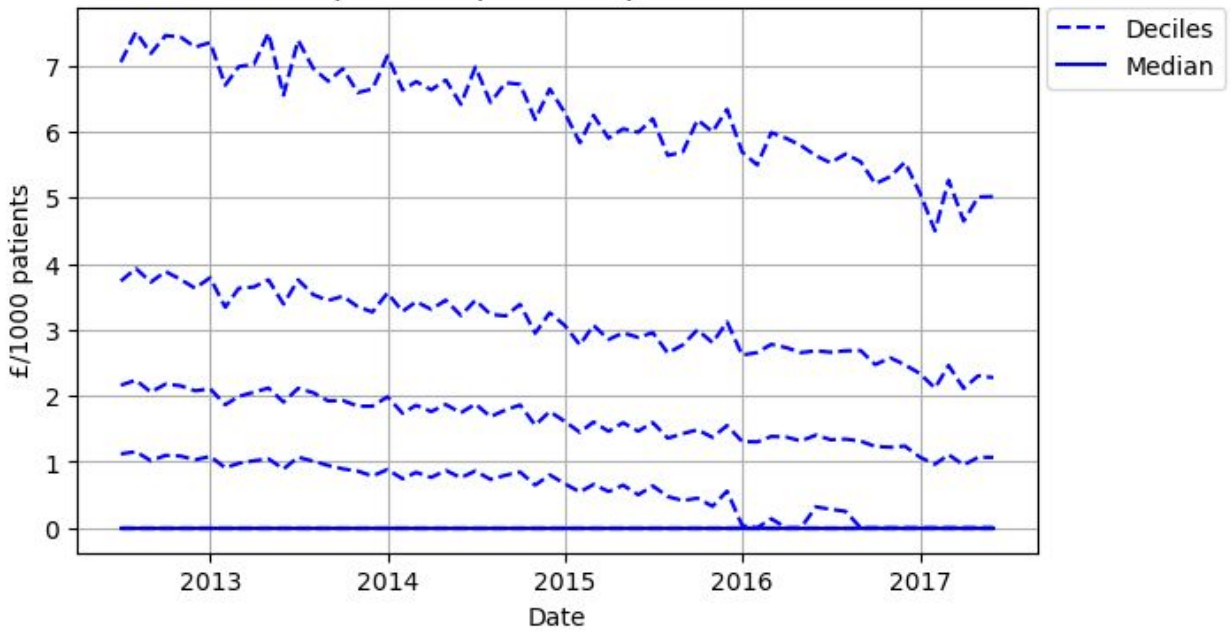

## Omega-3 fatty acid compounds

Variation in spending per thousand patients across CCGs in June 2017:

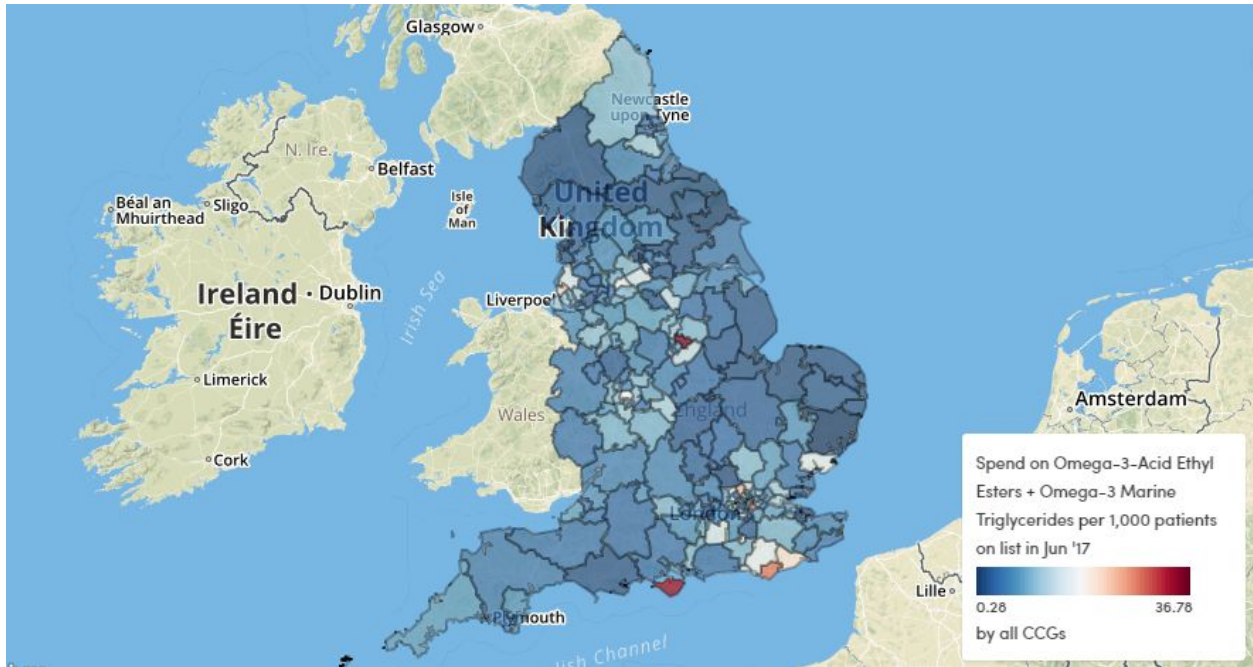

[Interactive map here](#)

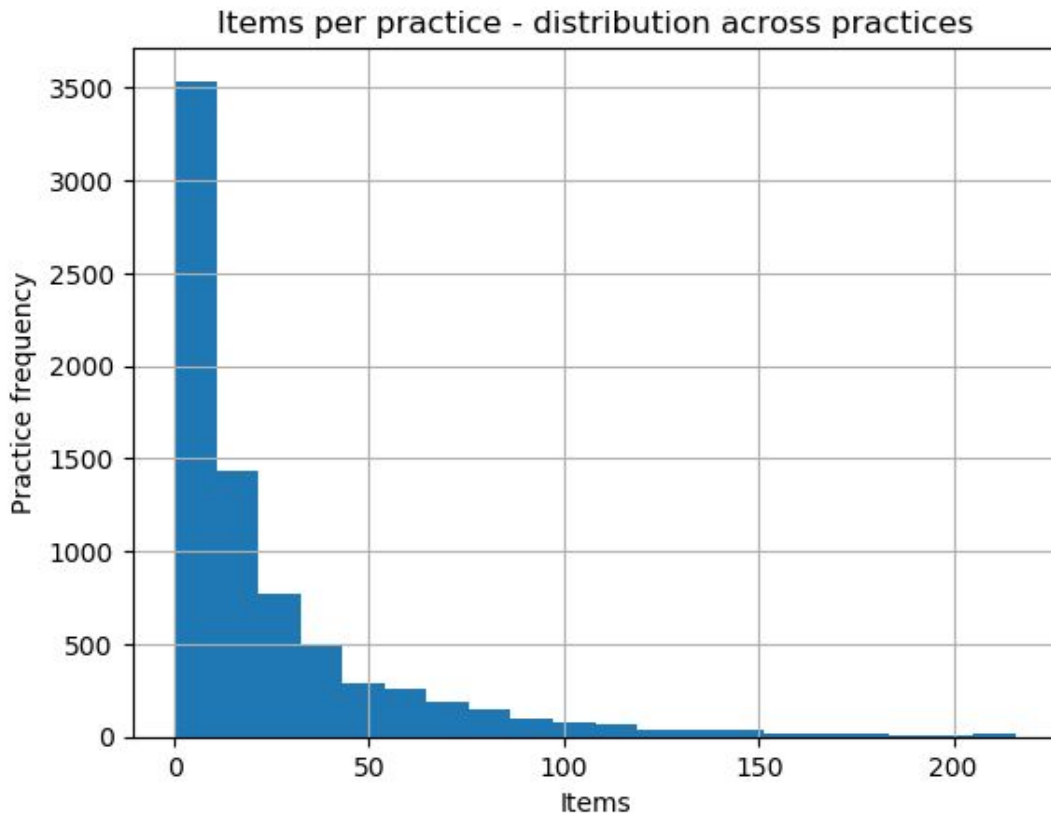

Number of practices prescribing zero items: 1923

Items per 1000 patients - practice deciles

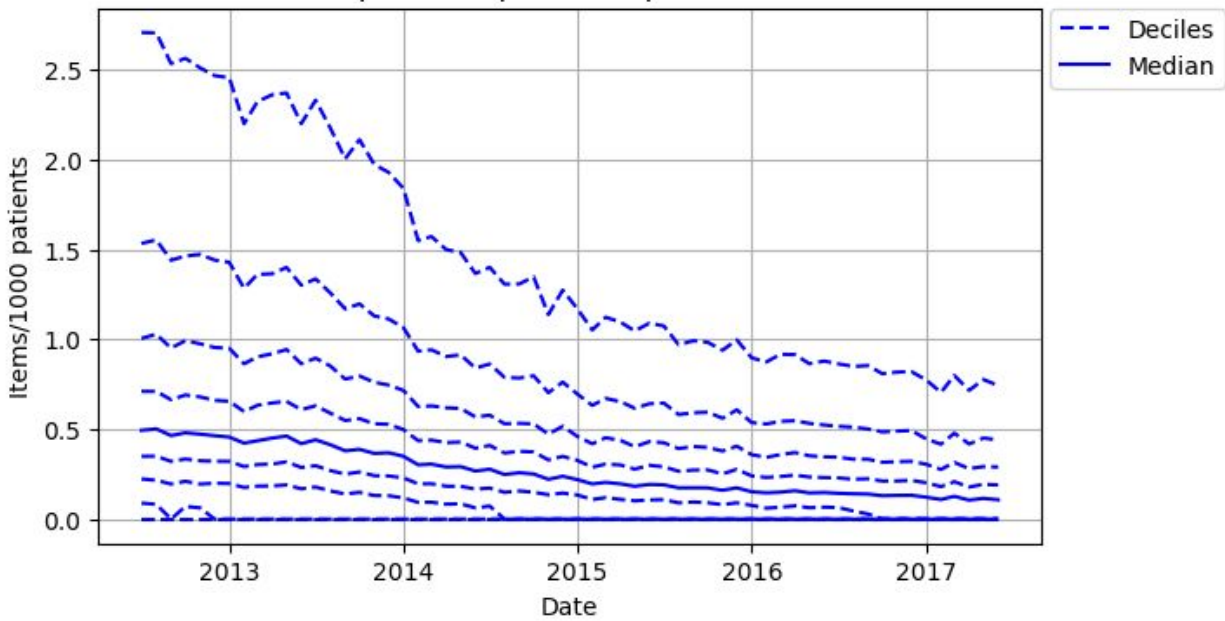

Cost per 1000 patients - practice deciles

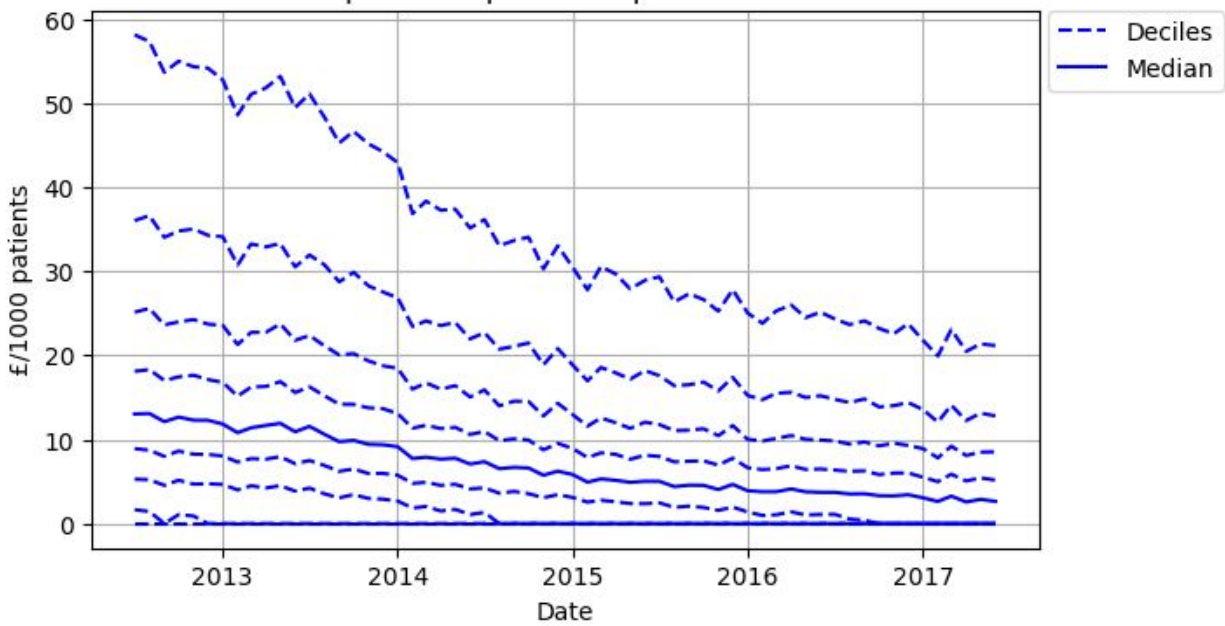



## Oxycodone and naloxone combination product

Variation in spending per thousand patients across CCGs in June 2017:

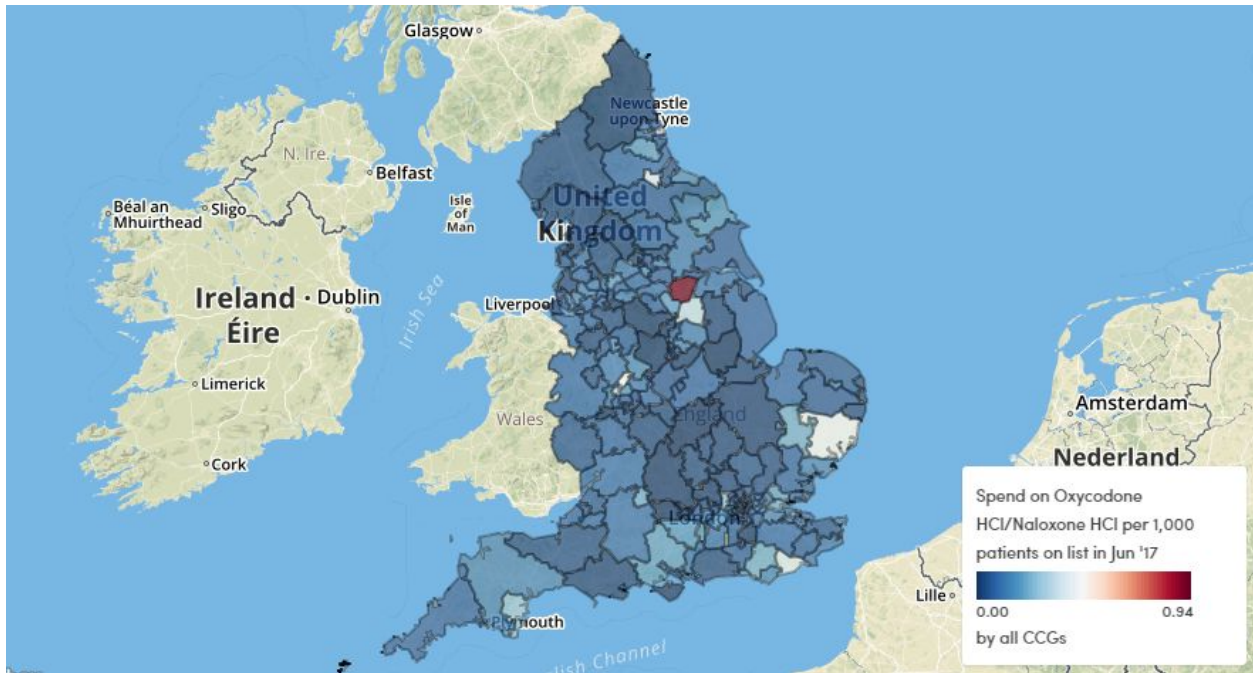

[Interactive map here](#)

### Items per practice - distribution across practices

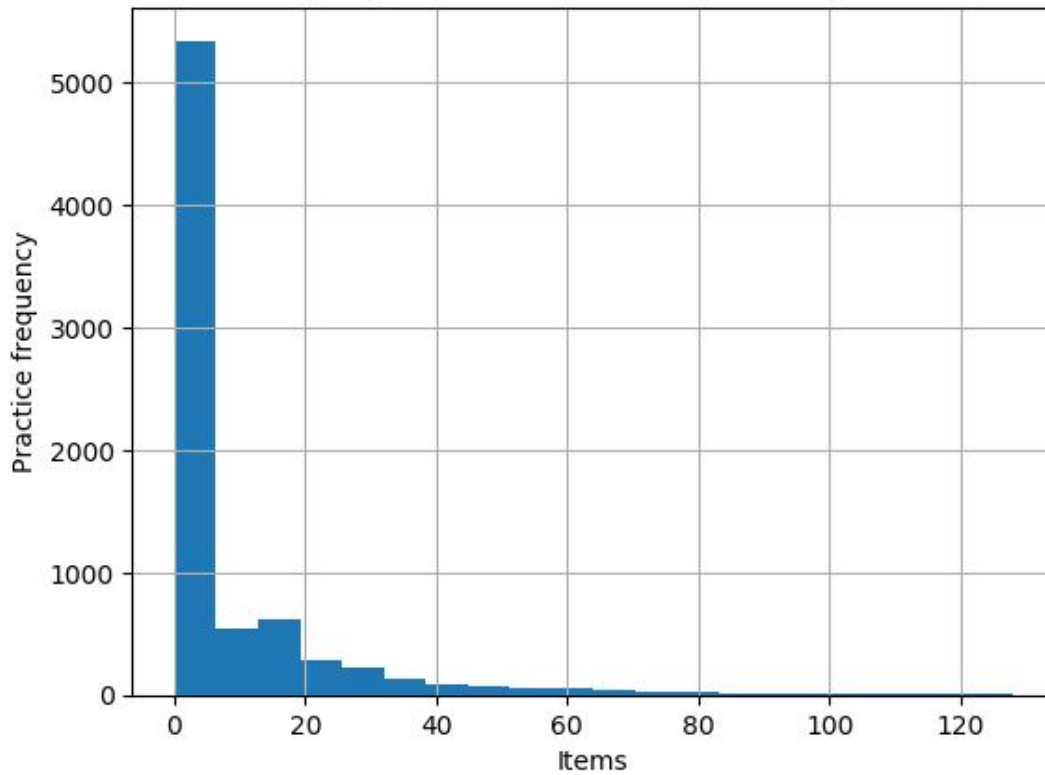

Number of practices prescribing zero items: 4417

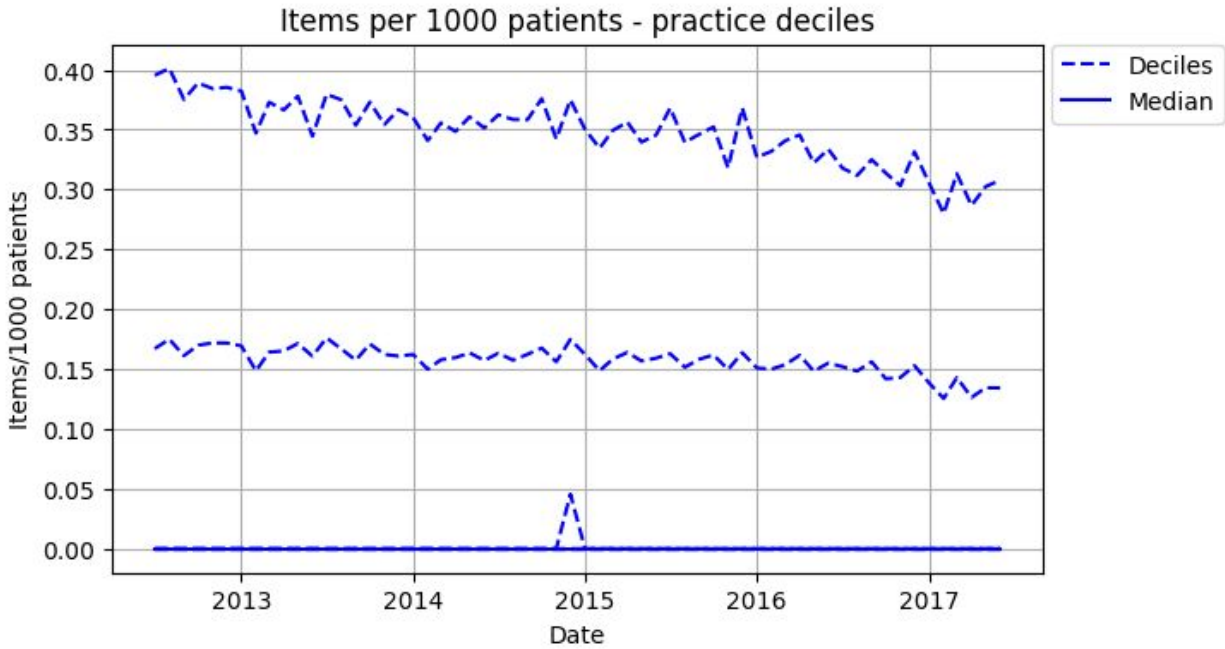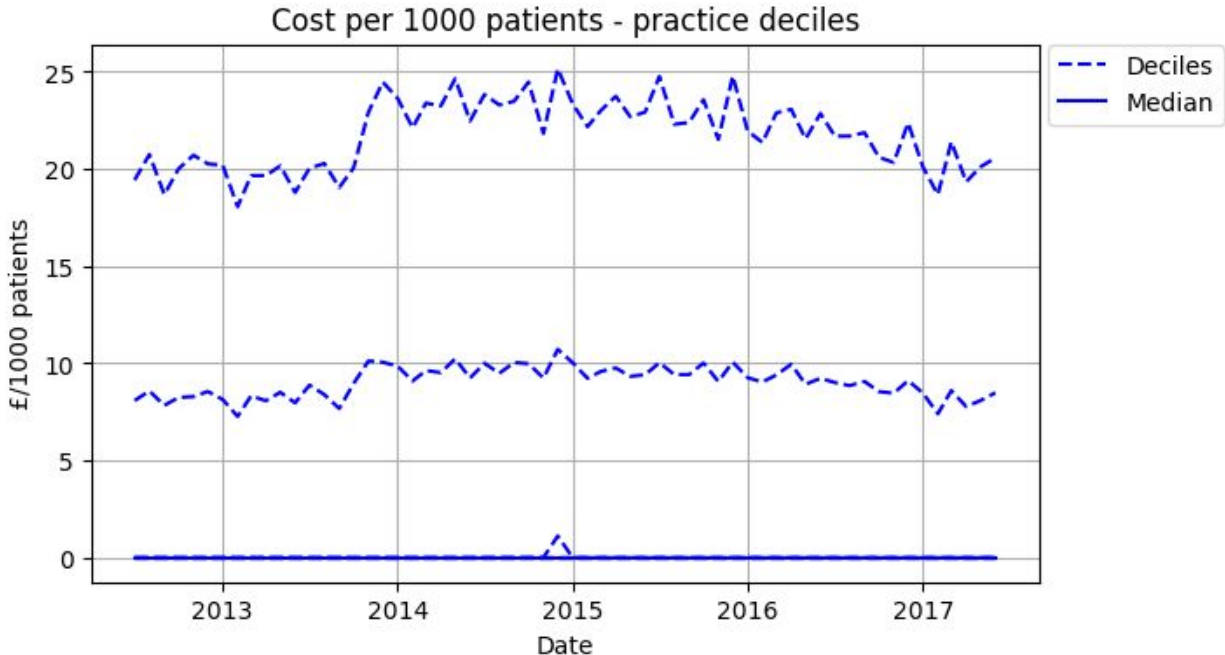

# Perindopril arginine

Variation in spending per thousand patients across CCGs in June 2017:

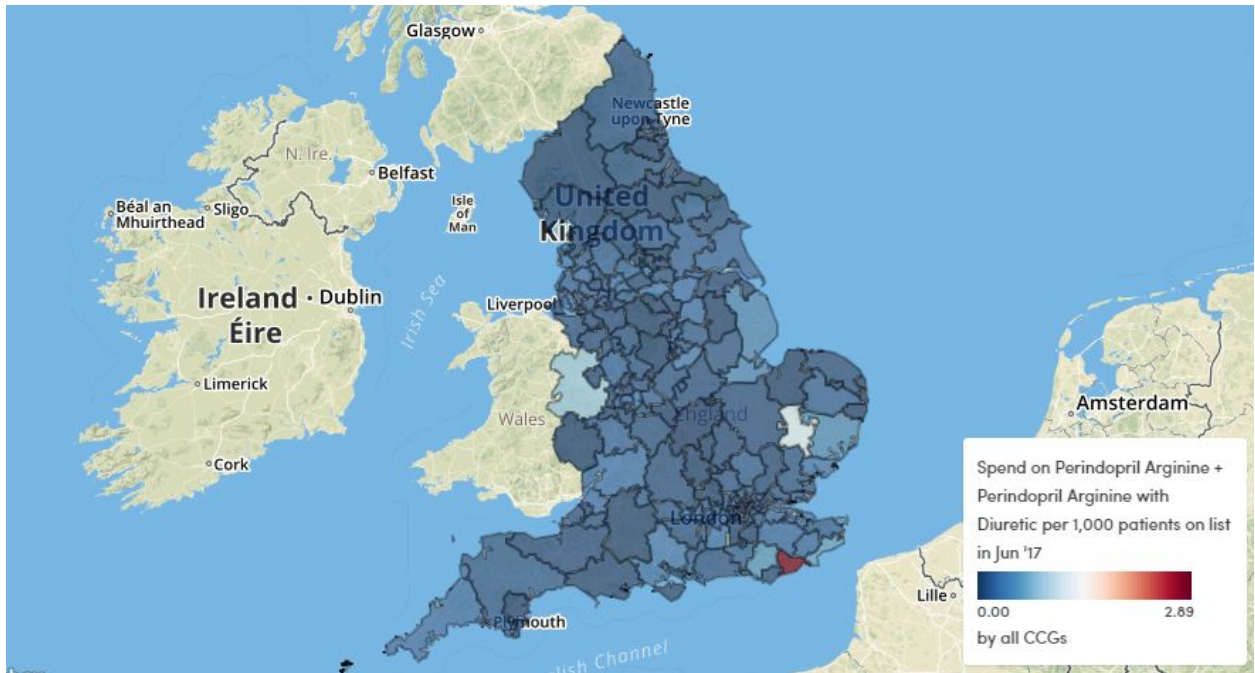

[Interactive map here](#)

### Items per practice - distribution across practices

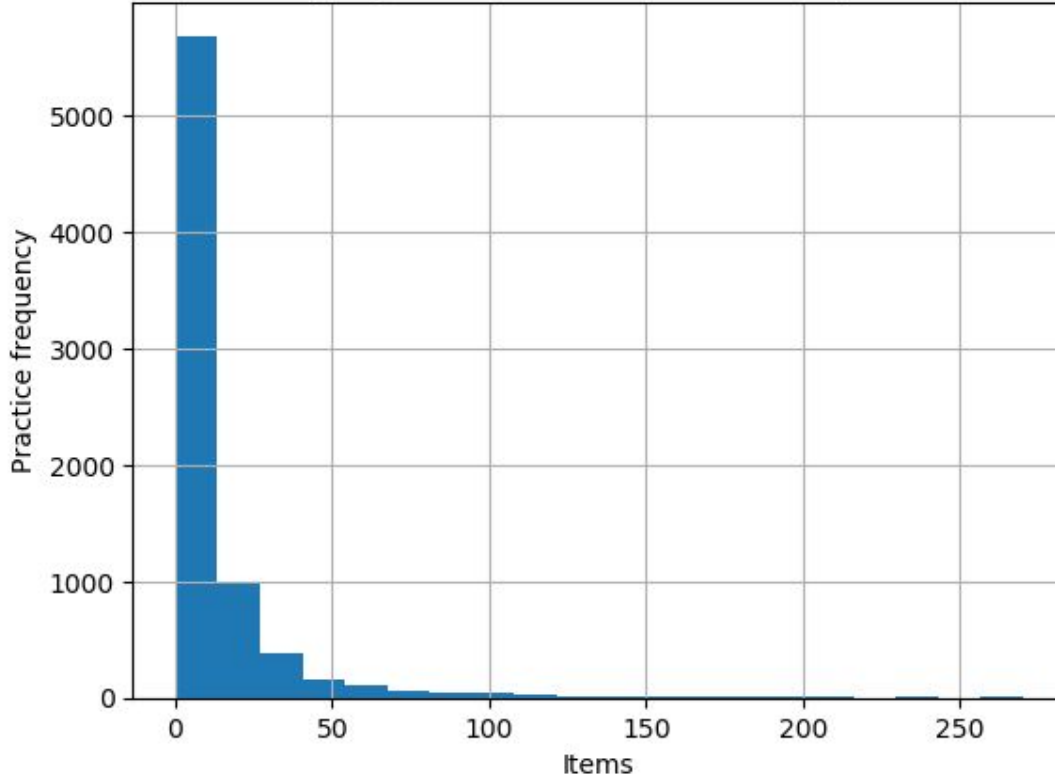

Number of practices prescribing zero items: 3025

Items per 1000 patients - practice deciles

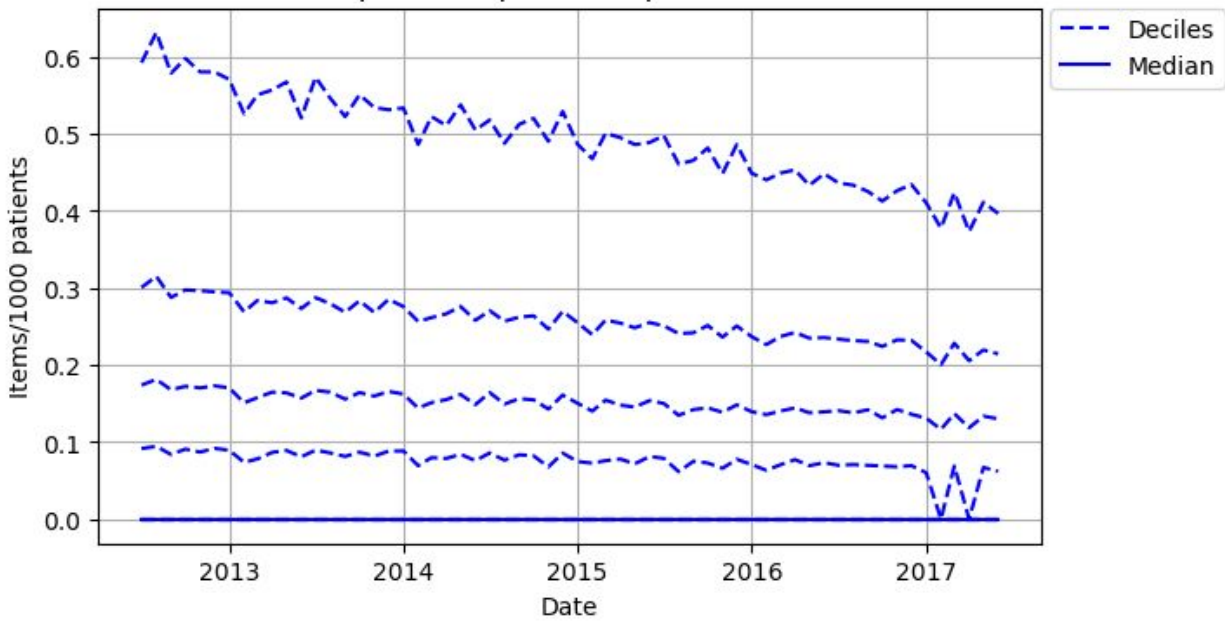

Cost per 1000 patients - practice deciles

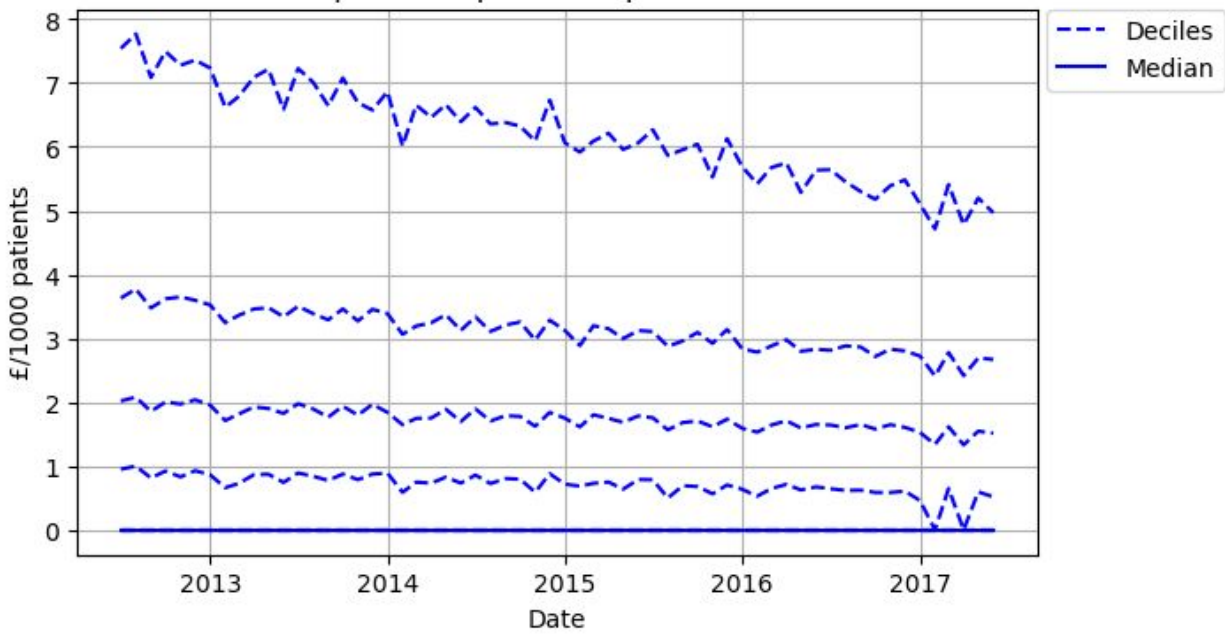

## Rubefaciants

Variation in spending per thousand patients across CCGs in June 2017:

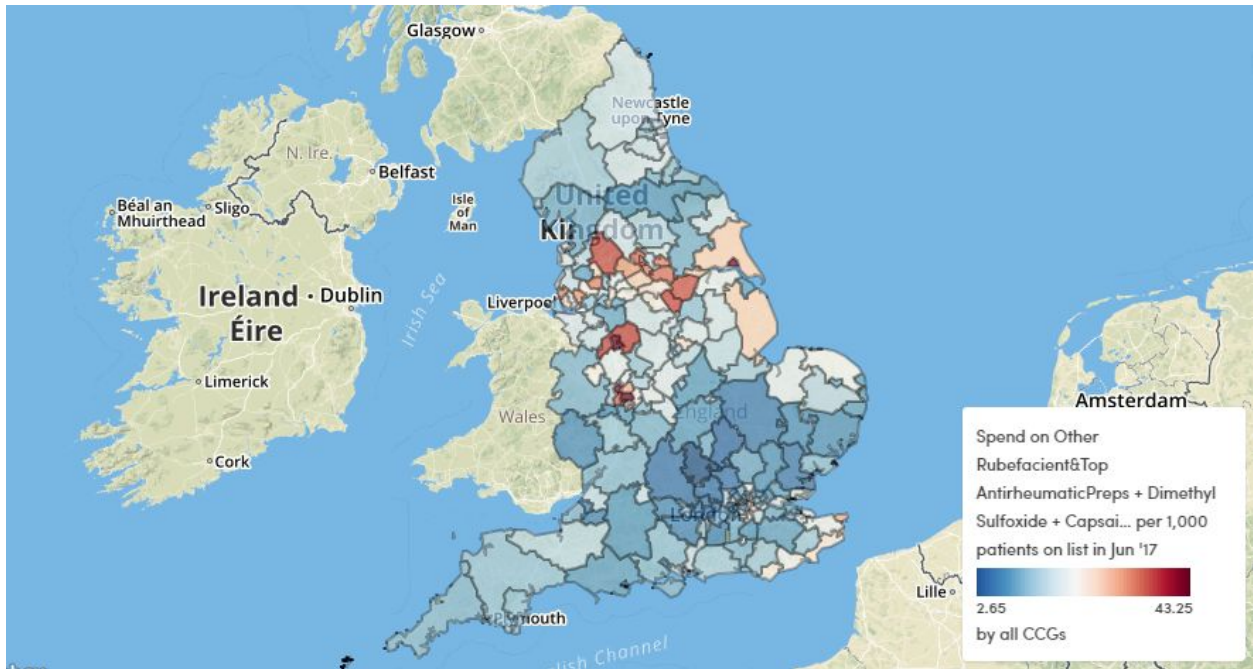

[Interactive map here](#)

### Items per practice - distribution across practices

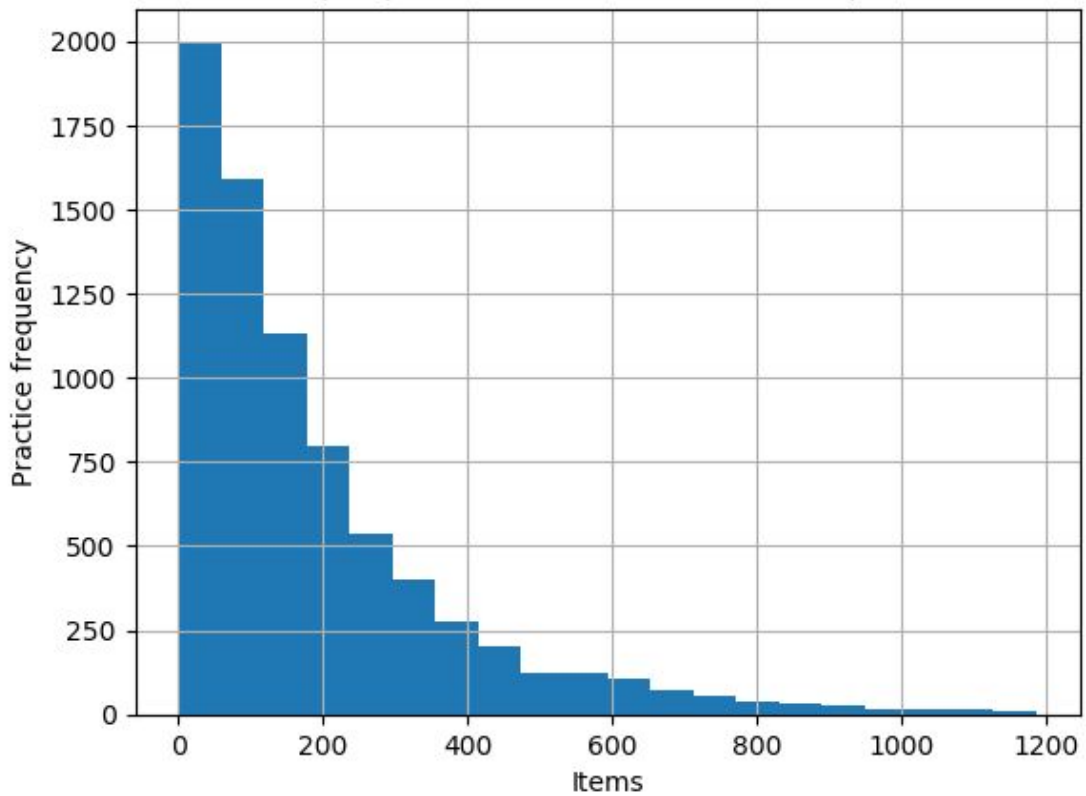

Number of practices prescribing zero items: 72



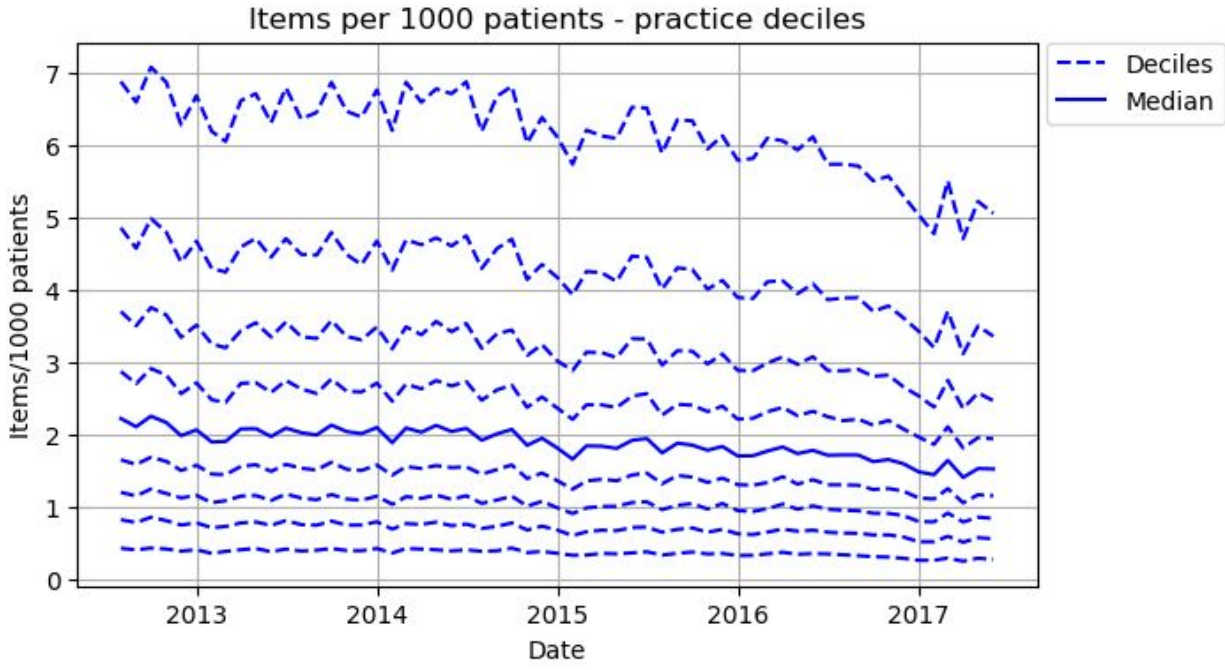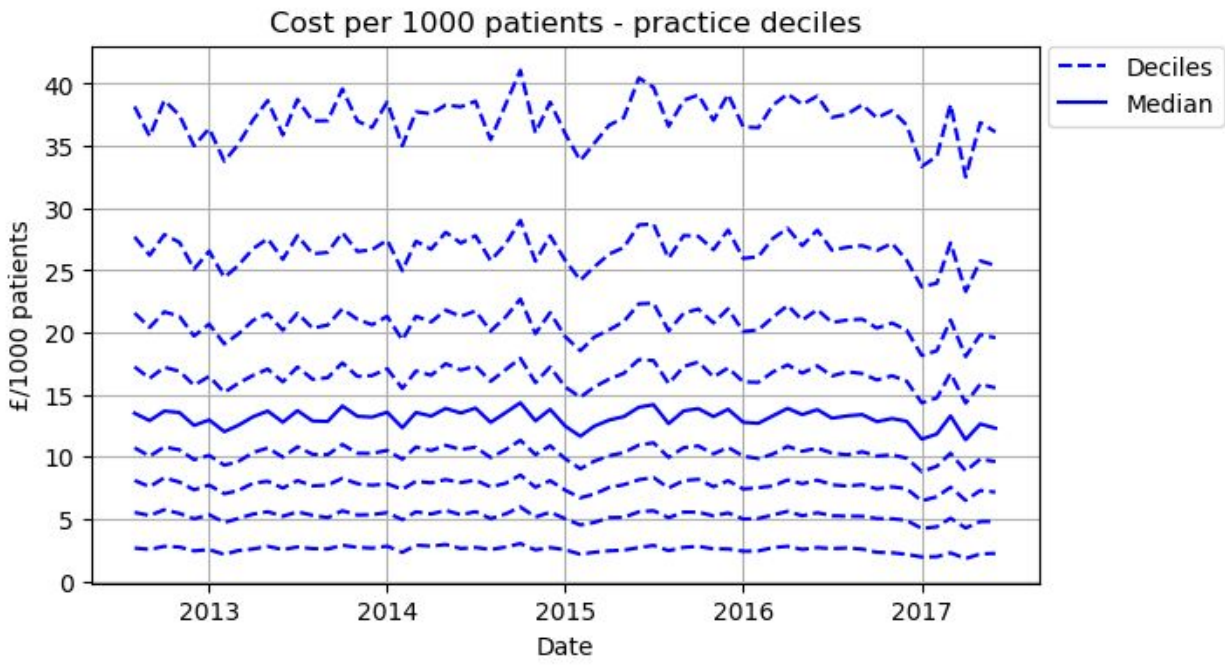

## Tadalafil once daily

Variation in spending per thousand patients across CCGs in June 2017:

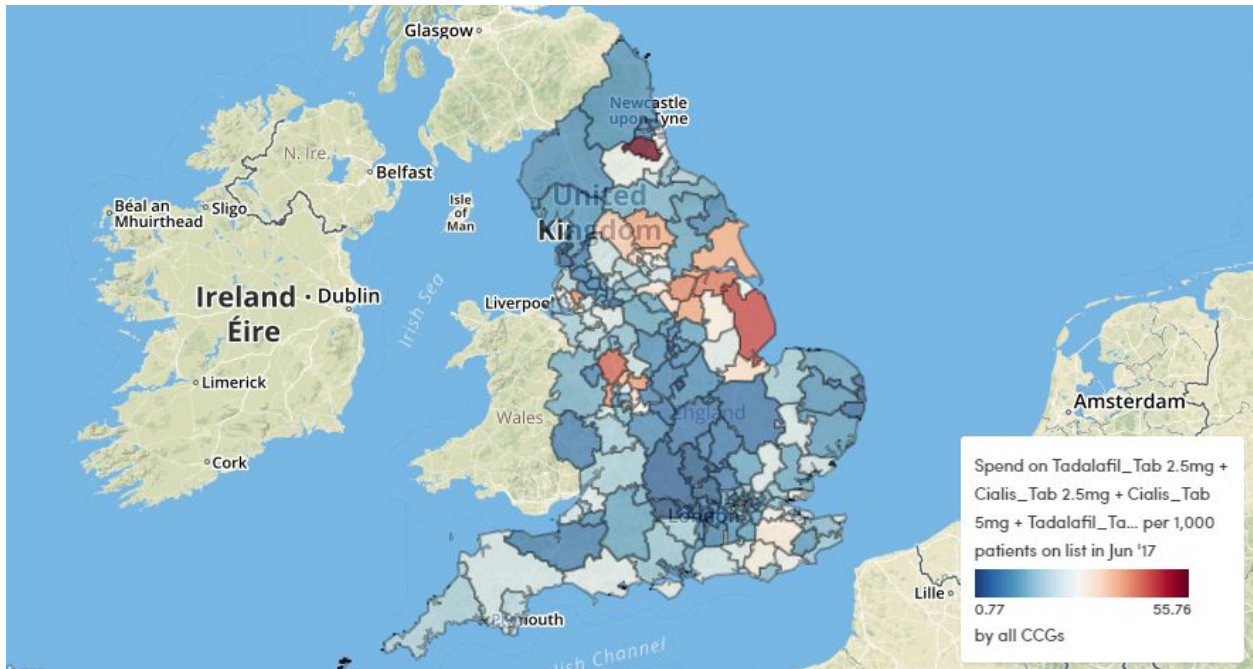

[Interactive map here](#)

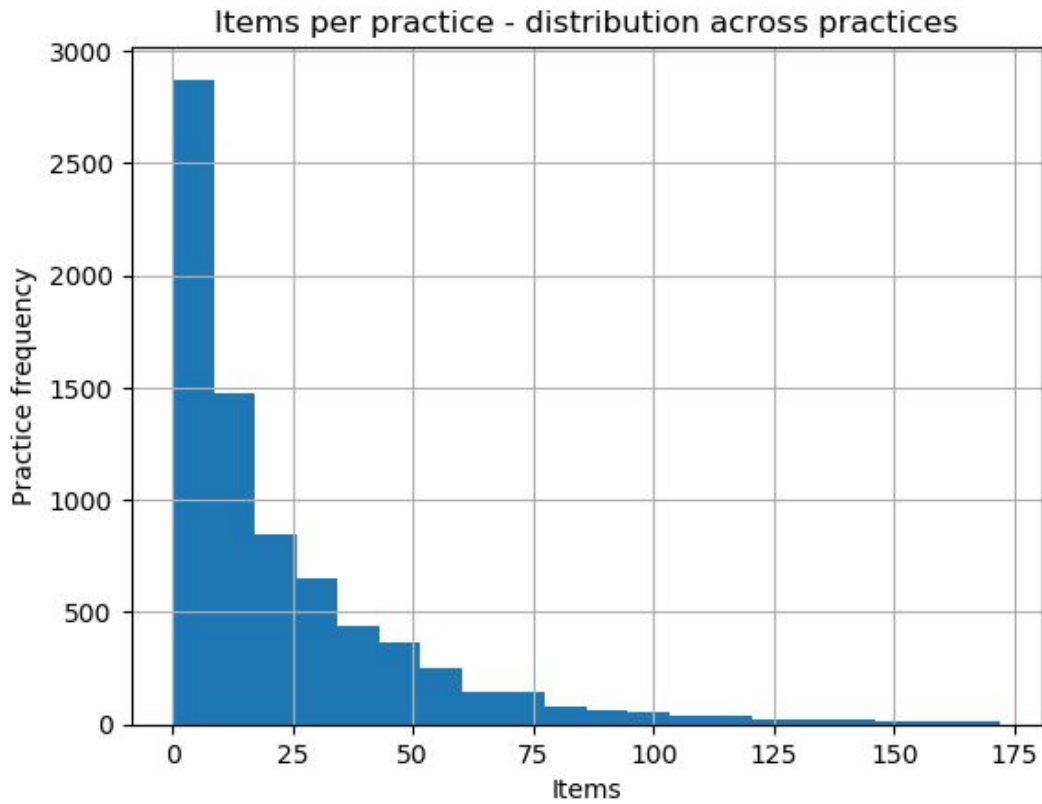

Number of practices prescribing zero items: 1241

Items per 1000 patients - practice deciles

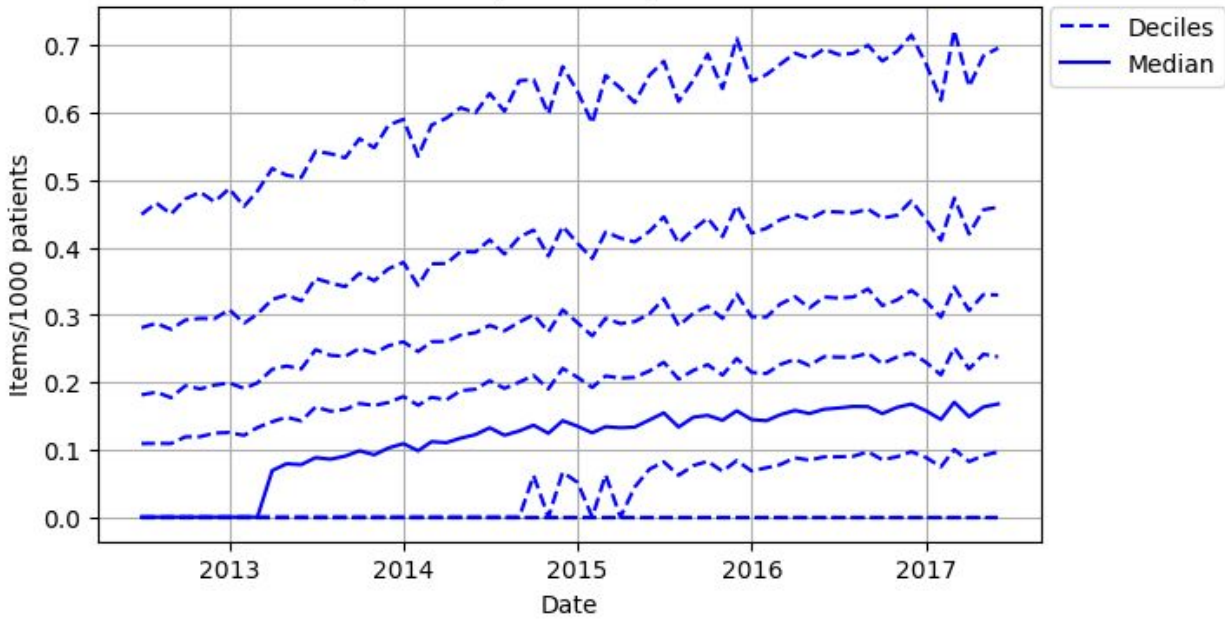

Cost per 1000 patients - practice deciles

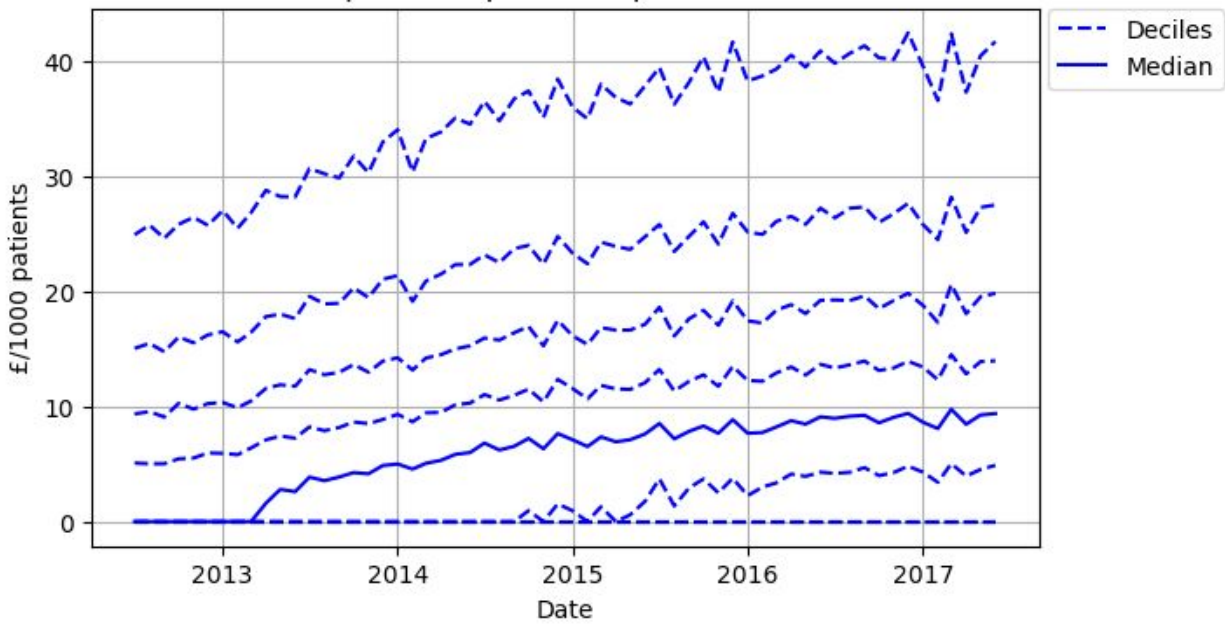

## Paracetamol and tramadol combination

Variation in spending per thousand patients across CCGs in June 2017:

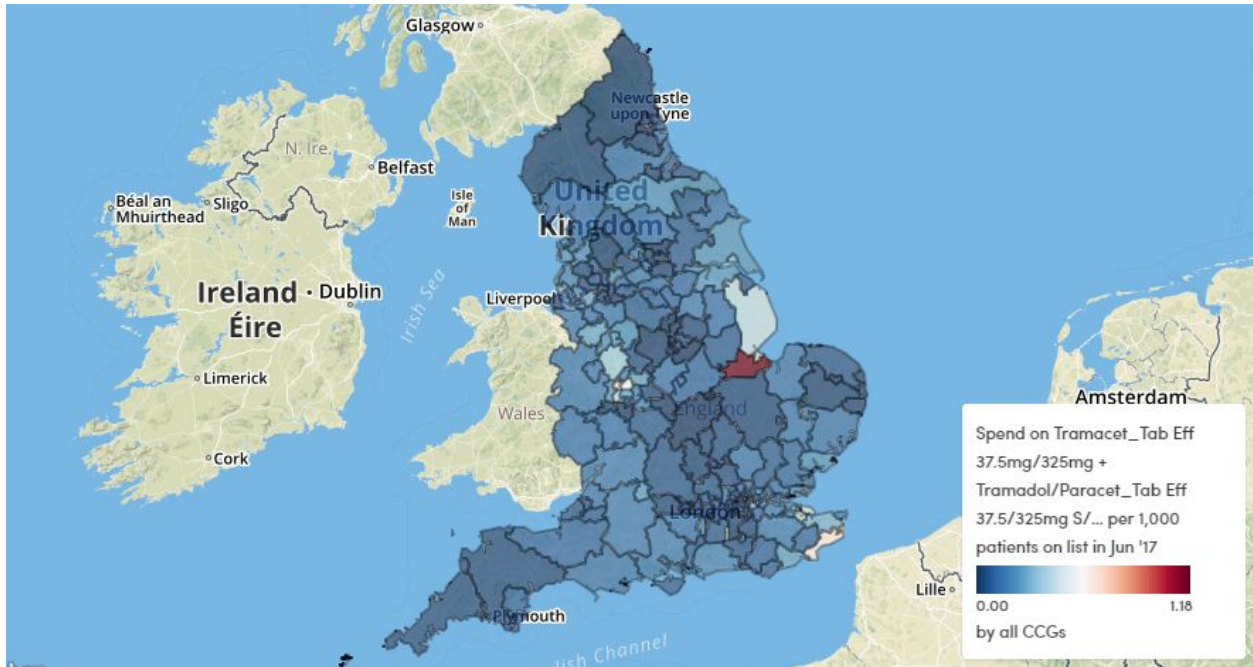

[Interactive map here](#)

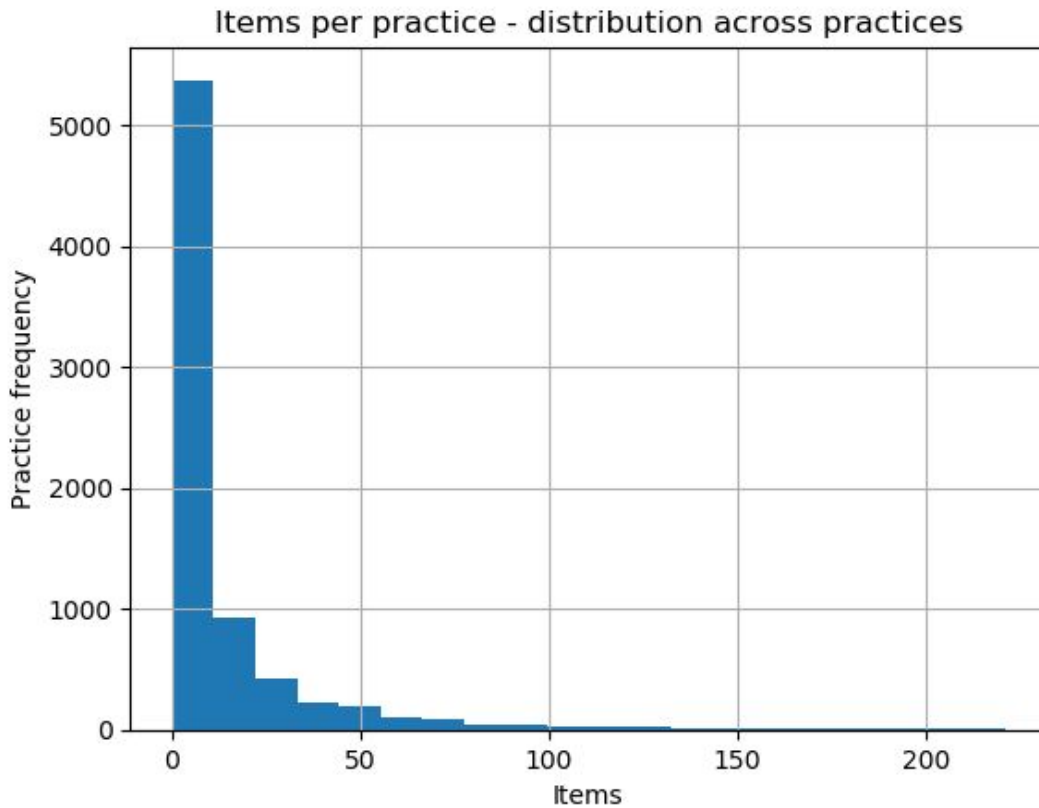

Number of practices prescribing zero items: 3309



Items per 1000 patients - practice deciles

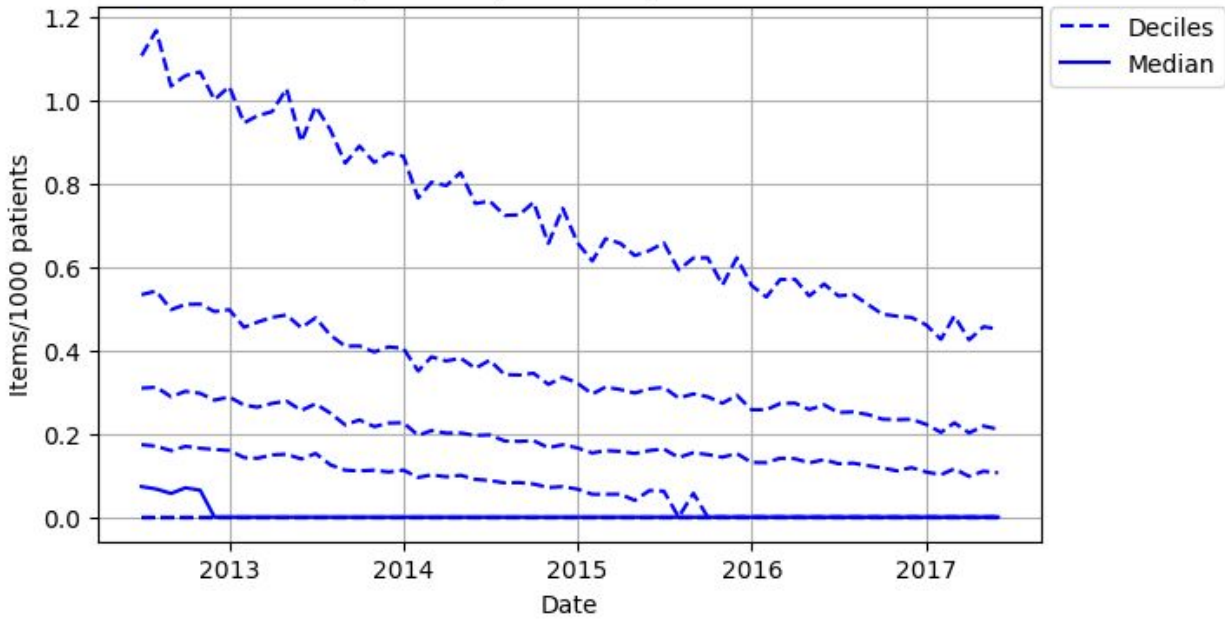

Cost per 1000 patients - practice deciles

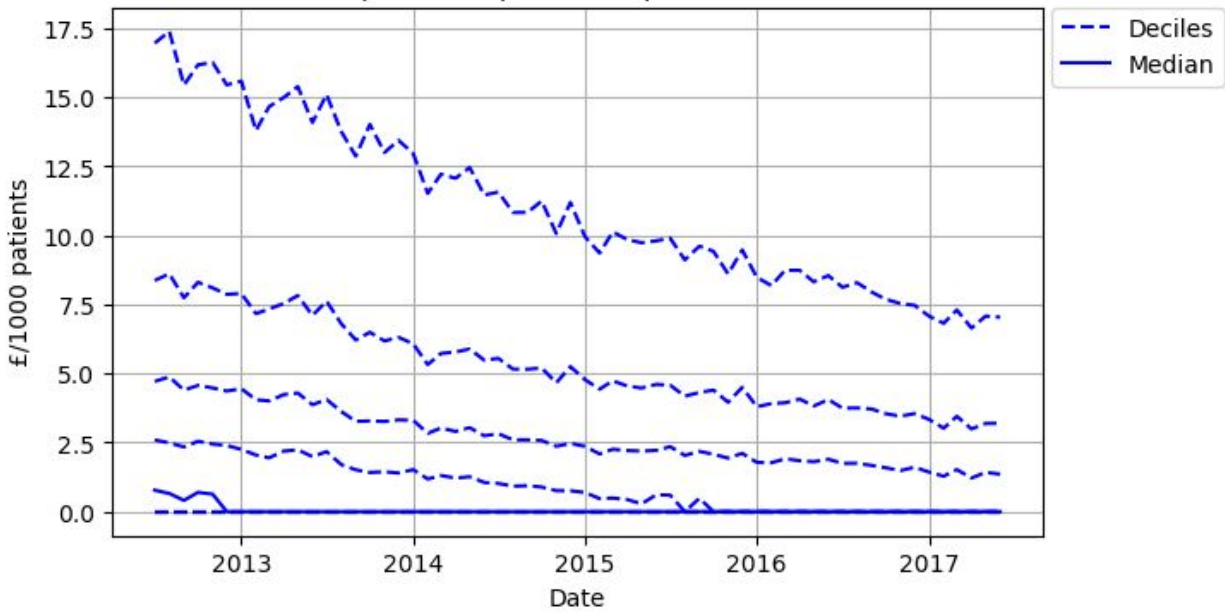



## Travel vaccines

Variation in spending per thousand patients across CCGs in June 2017:

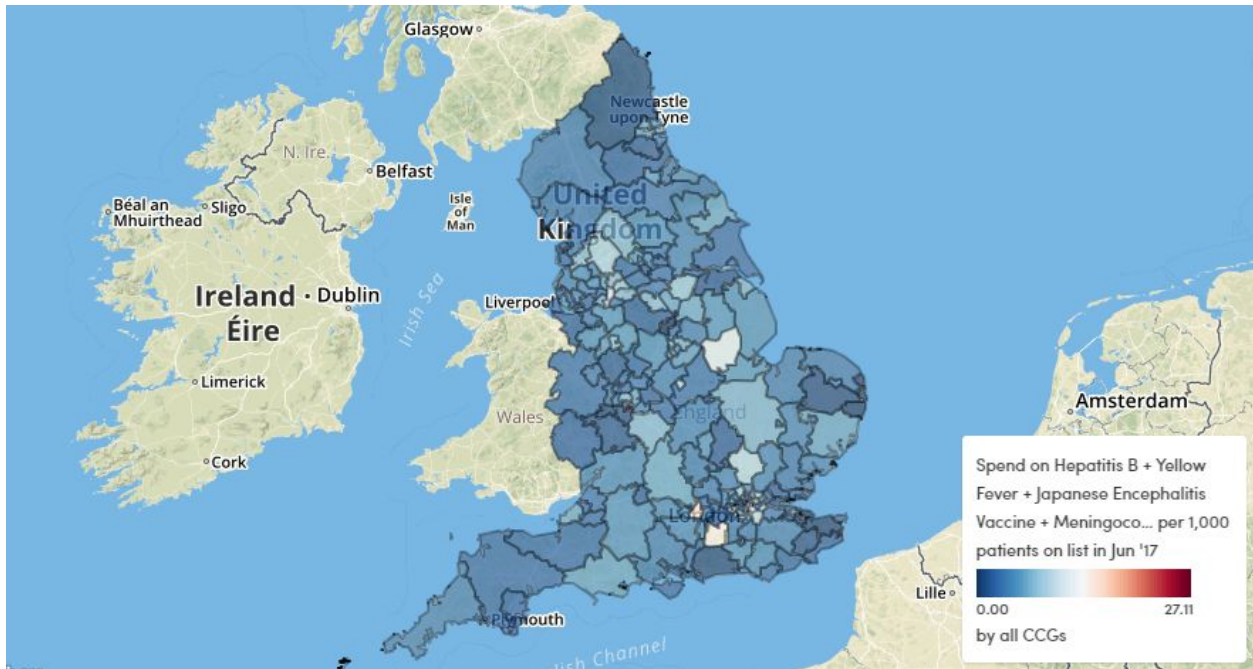

[Interactive map here](#)

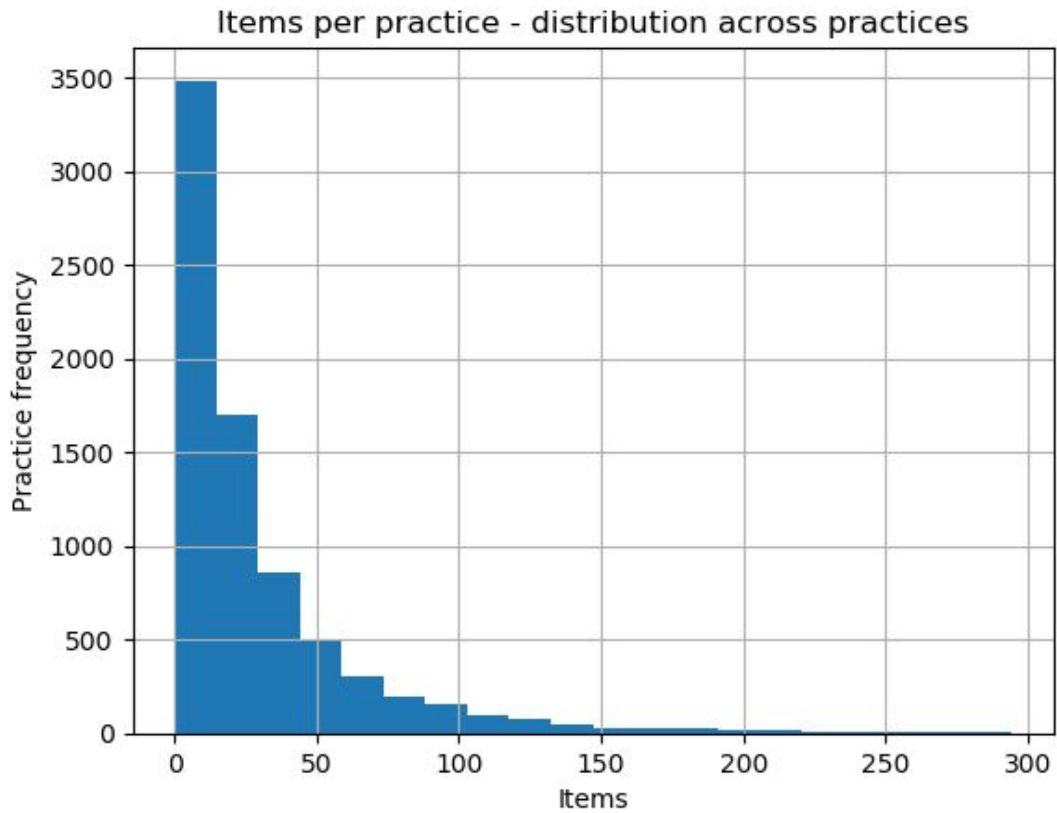

Number of practices prescribing zero items: 483

Items per 1000 patients - practice deciles

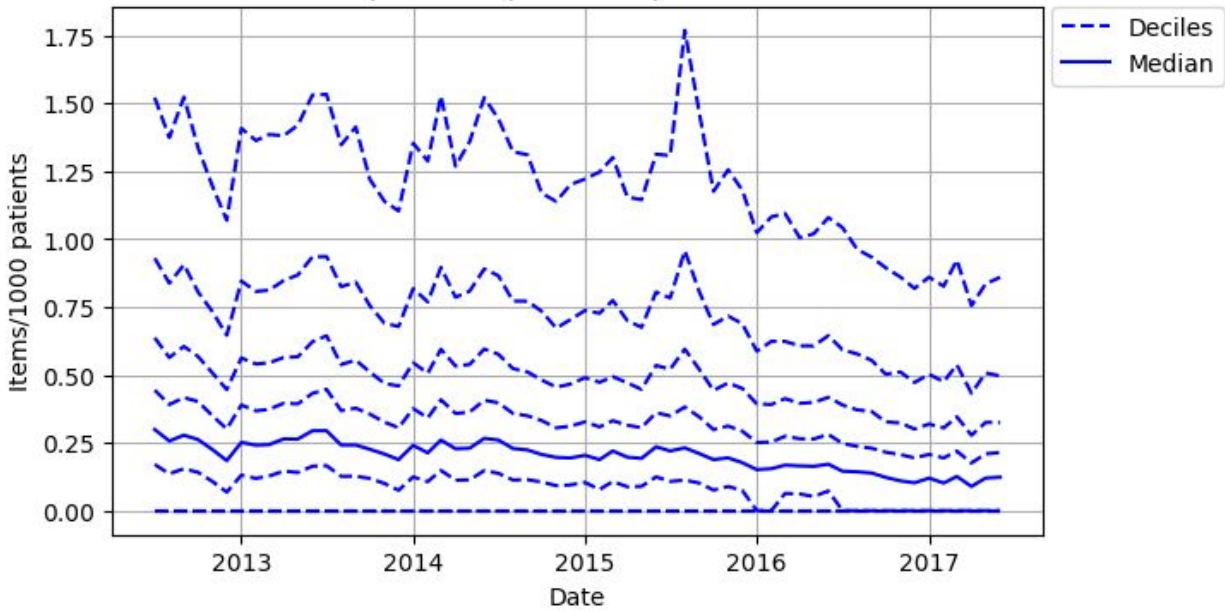

Cost per 1000 patients - practice deciles

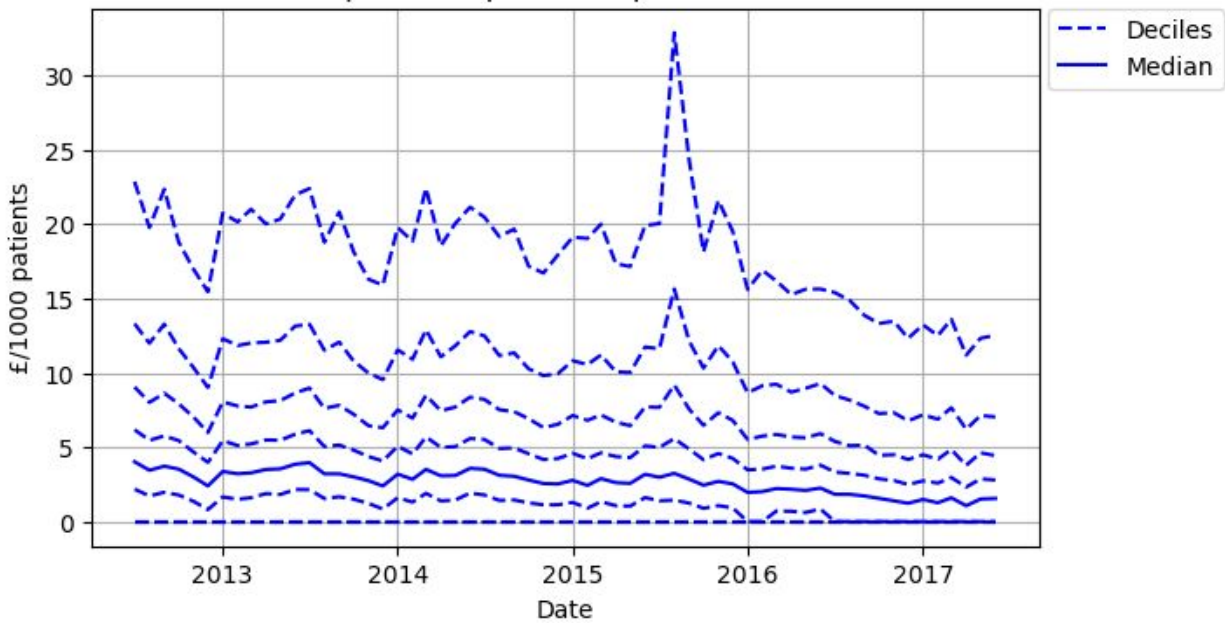

# Trimipramine

Variation in spending per thousand patients across CCGs in June 2017:

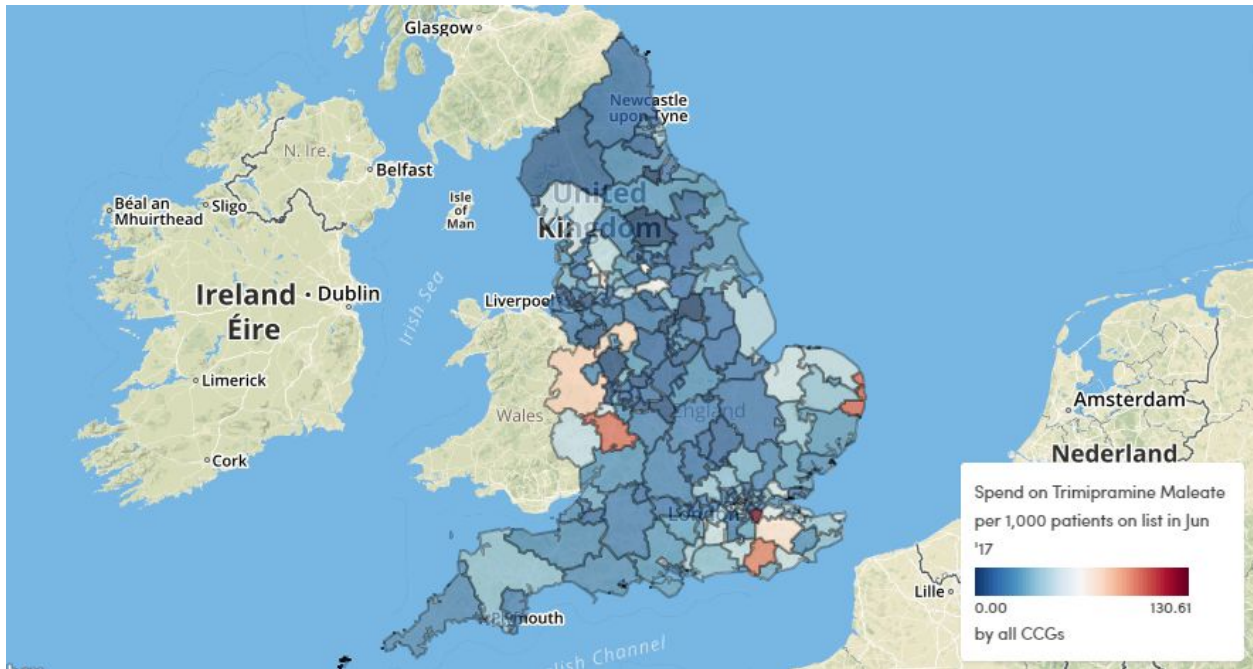

[Interactive map here](#)

### Items per practice - distribution across practices

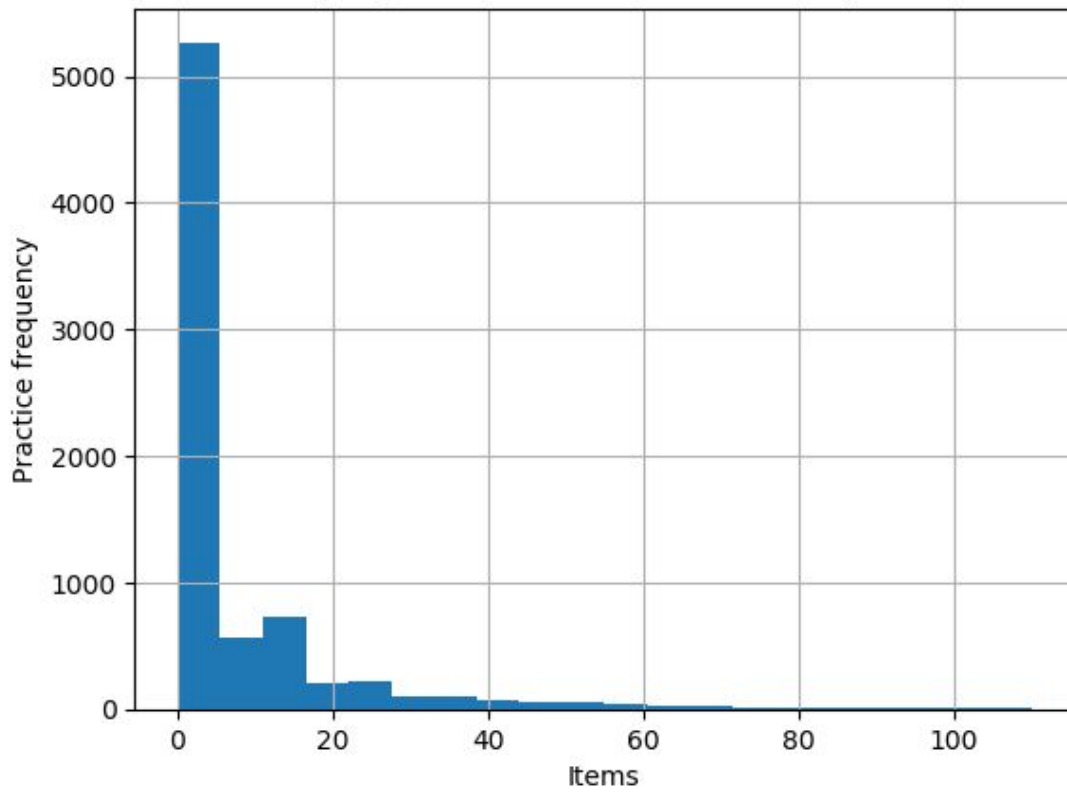

Number of practices prescribing zero items: 4700

Items per 1000 patients - practice deciles

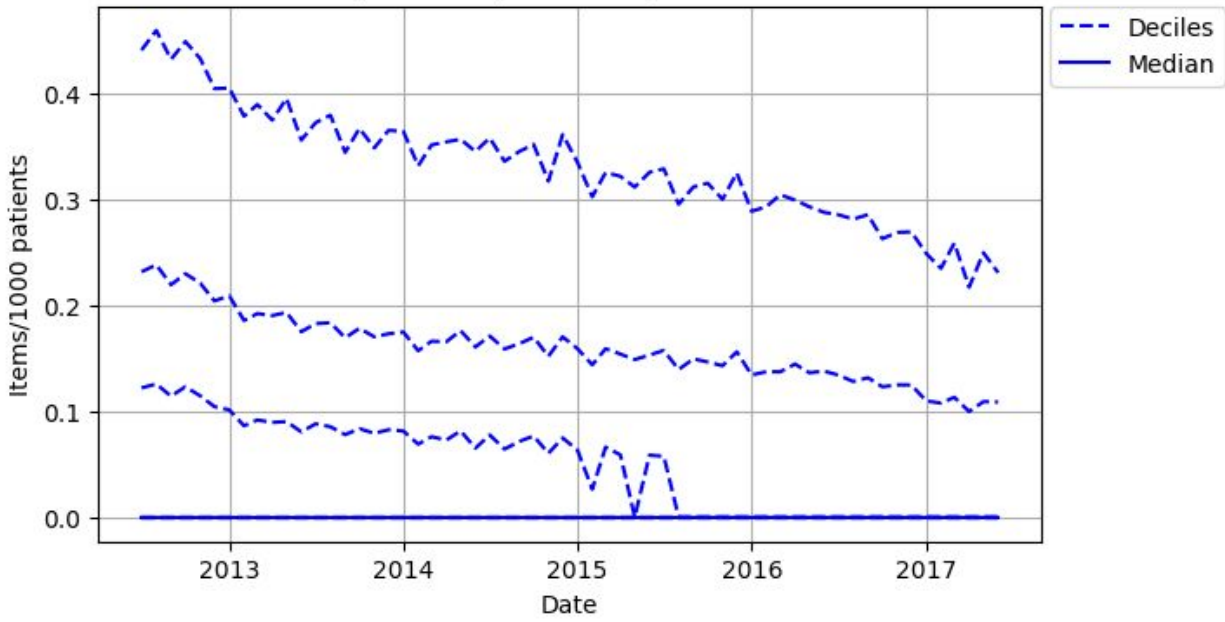

Cost per 1000 patients - practice deciles

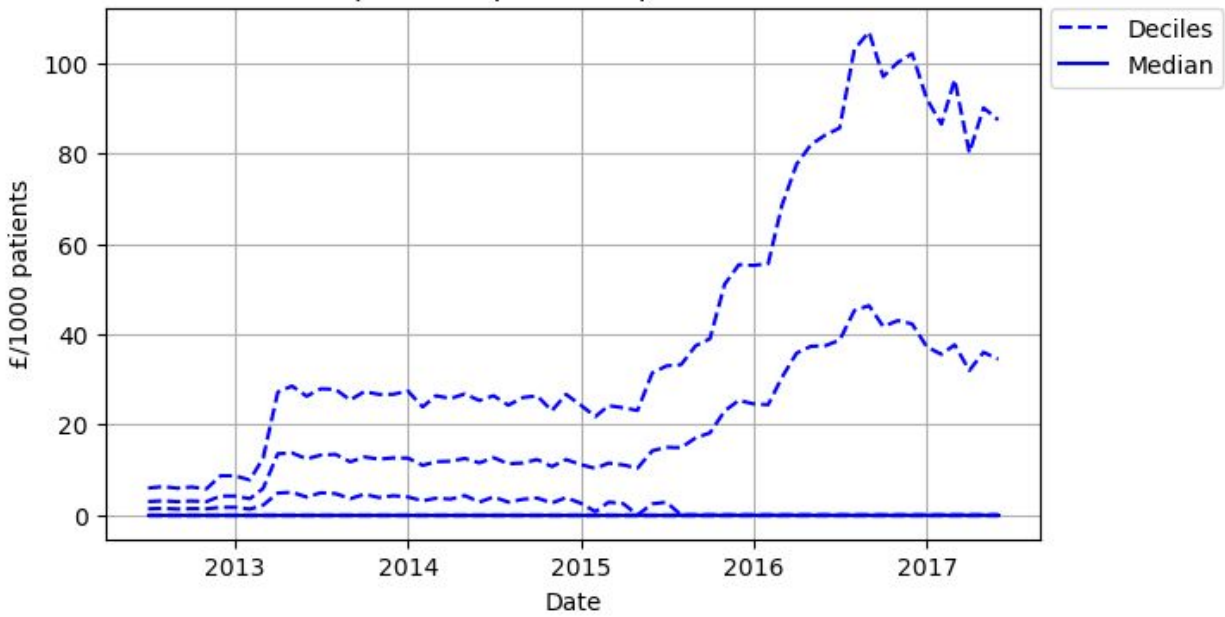

## Appendix B - BNF code list used to define medication prescribing

---

BNF codes as used in SQL queries to identify prescribing of each medicine (% = wildcard)

### **Co-proxamol**

0407010Q0%

### **Dosulepin**

0403010J0%

### **Doxazosin modified release**

0205040D0%AQ

0205040D0%AR

### **Fentanyl immediate release**

0407020A0%BI

0407020A0%BY

0407020A0%BK

0407020A0%BR

0407020A0%AJ

0407020A0%AV

0407020A0%BD

0407020A0%BX

0407020A0%AN

0407020A0%BM

0407020A0%BU

0407020A0%BN

0407020A0%BS

0407020A0%BT

0407020A0%AX

0407020A0%AM

0407020A0%AI

0407020A0%AW

0407020A0%AY

0407020A0%BV

0407020A0%BZ

0407020A0%BP

0407020A0%BE

0407020A0%BA

0407020A0%BH

0407020A0%BQ

0407020A0%BB

0407020A0%BF



0407020A0%AK  
0407020A0%BC  
0407020A0%BL  
0407020A0%AZ  
0407020A0%BJ  
0407020A0%AP  
0407020A0%BG  
0407020A0%AL

**Glucosamine and chondroitin**

1001050A0%  
1001050B0%  
091200000AADWDW%  
091200000AAECEC%  
091200000AAELEL%  
091200000AADGDG%  
091200000AAEEEE%  
091200000AADIDI%  
091200000AADJDJ%  
091200000BDGPA0%  
091200000BEWDA0%  
091200000BEAWA0%  
091200000BFMSEC%  
091200000BFRYFY%  
091200000AAEFEF%  
091200000BEZVA0%  
091200000BFRFEC%  
091200000BFMTTE%  
091200000BEWHA0%  
091200000AADYDY%  
091200000BFMJEC%  
091200000BFPZA0%  
091200000BEQMA0%  
091200000BFIDDI%  
091200000BFQXEF%  
091200000BFIYA0%  
091200000BFCEDG%  
091200000BFIFDI%  
091200000BEUGA0%  
091200000BERTA0%  
091200000BFREEE%  
091200000AAEGEG%  
091200000BETEA0%

091200000BFIGDW%  
091200000BFLDA0%  
091200000BCJNA0%  
091200000AAEYDY%  
091200000BFPYA0%  
091200000BFSXDY%  
091200000BFNIA0%  
091200000BERWA0%  
091200000BFATDG%  
091200000BEFRA0%  
091200000BFNYDI%  
091200000BFNXA0%  
091200000BFJJJDY%  
091200000BFMBDG%  
091200000BFSRA0%  
091200000BDUUA0%  
091200000BCWWA0%  
091200000BFNTA0%  
091200000BFNLA0%  
091200000BFPGA0%  
091200000BFDSDJ%  
091200000BFRHDJ%  
091200000BEVPA0%  
091200000BFQSEF%  
091200000BDYUA0%  
091200000BFPMEF%  
091200000BFPJEC%  
091200000BFPPEC%  
091200000BFQNA0%  
091200000BDWXA0%  
091200000BFNAEE%  
091200000BFKIA0%  
091200000BFPWEQ%  
091200000BFSUA0%  
091200000BFSQEQ%  
091200000BEWBA0%  
091200000BFMYEC%

**Gluten free products**

0904010AK%  
0904010I0%  
0904010H0%  
0904010L0%

0904010J0%  
0904010Z0%  
0904010F0%  
0904010AE%  
090401050%  
0904010V0%  
090401060%  
0904010E0%  
0904010T0%  
0904010AF%  
090401030%  
0904010Q0%  
0904010A0%  
0904010U0%  
0904010AD%  
0904010AC%  
0904010AB%  
090401070%  
0904010AI%  
0904010AJ%  
0904010AH%  
0904010AG%  
0904010AA%  
090401080%  
0904010AU%

### **Homeopathy**

190203%

### **Lidocaine plasters**

1502010J0%EL

### **Liothyronine**

0602010M0%

### **Lutein and antioxidants**

091000000BBVZA0%  
091000000BBVGA0%  
091000000BBWQA0%  
091000000BBTPA0%  
091000000BBVFA0%  
091000000BBVXA0%  
091000000BBVTA0%

091000000BBWVA0%  
091000000BBUZA0%  
091000000BBWPA0%  
091000000BBTAA0%  
091000000BBUQA0%  
091000000BBWNA0%  
091000000BBVQA0%  
091000000BBWHA0%  
091000000BBUSA0%  
091000000BBWWA0%  
091000000BBVSA0%  
091200000BFLHA0%  
091200000BEJYA0%  
091200000BEXXA0%

### **Omega-3 fatty acid compounds**

0212000AB%  
0212000V0%

### **Oxycodone and naloxone combination product**

0407020AF%

### **Perindopril arginine**

0205051Y0%  
0205051Z0%

### **Rubefacients**

100302000%  
100302040%  
1003020AA%  
1003020AB%  
1003020B0%  
1003020C0%  
1003020D0%  
1003020E0%  
1003020F0%  
1003020G0%  
1003020H0%  
1003020I0%  
1003020J0%  
1003020K0%  
1003020L0%  
1003020N0%

1003020Q0%  
1003020S0%  
1003020T0%  
1003020V0%  
1003020W0%  
1003020X0%  
1003020Y0%  
1003020Z0%

**Tadalafil once daily**

0704050R0%AC  
0704050R0%AD

**Paracetamol and tramadol combination**

040702040%AU  
040702040%BA

**Travel vaccines**

1404000G0%  
1404000U0%  
1404000AB%  
1404000X0%  
1404000AA%  
1404000N0%  
0802040X0%

**Trimipramine**

0403010Y0%



## Appendix C: level of missing data within dataset

| Variable                                              | Missing values | % missing   |
|-------------------------------------------------------|----------------|-------------|
| Quality outcomes framework (QOF) score                | 0              | 0.0%        |
| Index of Multiple Deprivation (IMD)                   | 1              | 0.0%        |
| Practice list size                                    | 0              | 0.0%        |
| Dispensing practice status                            | 0              | 0.0%        |
| % of patients over 65                                 | 1              | 0.0%        |
| % of patients with a long term health condition       | 6              | 0.1%        |
| <b>Practices with complete data for all variables</b> | <b>7489</b>    | <b>0.1%</b> |
